1 Nests of red wood ants (*Formica rufa*-group) are positively associated with tectonic

2 faults: a double-blind test

3

4 **Authors:** Israel Del Toro<sup>1,2</sup>, Gabriele Berberich<sup>3</sup>, Relena R. Ribbons<sup>1</sup>, Martin B.

5 Berberich<sup>4</sup>, Nathan J. Sanders<sup>2,5</sup>, Aaron M. Ellison<sup>6</sup>

6

7 **Institutions:**

8 <sup>1</sup>Lawrence University, Biology Department, 711 E. Boldt Way, Appleton WI, 54911,

9 USA

10 <sup>2</sup>Center for Macroecology, Evolution, and Climate, University of Copenhagen,

11 Universitetsparken 15, Copenhagen, Denmark

12 <sup>3</sup>University Duisburg-Essen, Faculty of Biology, Department of Geology, Universitätsstr.

13 5, 45141 Essen, Germany

14 <sup>4</sup>IT-Consulting Berberich, Am Plexer 7, 50374 Erftstadt, Germany

15 <sup>5</sup>Rubenstein School of Environment and Natural Resources, University of Vermont,

16 Burlington, Vermont 05405, USA

17 <sup>6</sup>Harvard University, Harvard Forest, 324 North Main Street, Petersham, Massachusetts,

18 01366 USA

19

20 **Abstract**

21 Ecological studies aim to better understand the distribution and abundances of organisms.

22 Yet ecological works often are subjected to unintentional biases thus an improved

23 framework for hypothesis testing should be used. Double-blind ecological studies are rare

24 but necessary to minimize sampling biases and omission errors and improve the  
25 reliability of research. We used a double-blind design to evaluate associations between  
26 nests of red wood ants (*Formica rufa*, RWA) and the distribution of tectonic faults. We  
27 randomly sampled two regions in western Denmark to map the spatial distribution of  
28 RWA nests. We then calculated nest proximity to the nearest active tectonic faults. Red  
29 wood ant nests were eight times more likely to be found within 60 meters of known  
30 tectonic faults than were random points in the same region but without nests. This pattern  
31 paralleled the directionality of the fault system, with NNE-SSW faults having the  
32 strongest associations with RWA nests. The nest locations were collected without  
33 knowledge of the spatial distribution of active faults thus we are confident that the results  
34 are neither biased nor artefactual. This example highlights the benefits of double-blind  
35 designs in reducing sampling biases, testing controversial hypotheses, and increasing the  
36 reliability of the conclusions of research.

37

## 38 **Introduction**

39 A central question for ecology—the study of the distribution and abundance of  
40 organisms—is why do organisms occur where they do? Explanations include  
41 relationships between organisms and specific environments, interspecific interactions, or  
42 random chance. All of these explanations have been suggested to apply to ants, one of the  
43 most widespread and abundant taxon on Earth [1,2]. Berberich and Schreiber [3] and  
44 Berberich et al. [4] reported a seemingly peculiar positive spatial association between the  
45 geographically widespread, conspicuous red wood ants (*Formica rufa*-group) and  
46 seismically active, degassing tectonic faults. This work has been difficult to publish

47 because reviewers have suggested that the authors are ignoring alternative explanations  
48 or are ignorant of the basic biology of ants (Table 1). Admittedly, it is peculiar that ants  
49 would be associated with degassing tectonic faults. Such critiques are familiar to anyone  
50 who has proposed a new or controversial hypothesis.

51 Here, we confront the observations of Berberich and colleagues using a double-  
52 blind study. Double-blind studies, in which treatment assignments (or data collected) are  
53 concealed to researchers and subjects, are the most robust ones for testing any hypothesis,  
54 especially controversial ones, and increase the reliability of results and conclusions [5].  
55 Double-blind designs are routine in medical sciences, but rare in ecology [6]. To test  
56 more robustly the hypothesis that RWA nests are associated with active faults, we used a  
57 double-blind design in which myrmecologists who were unaware of this hypothesis or  
58 any published work on links between RWA and seismic activity (IDT and RRR) were  
59 sent into the field to map RWA nests. Simultaneously, maps of active tectonic faults in  
60 the region were obtained and organized by geoscientists (GMB and MBB) without any  
61 knowledge of the field data. With these two independently collected datasets, we then  
62 asked whether ants were positively associated with tectonic faults.

63

## 64 **Methods and Materials**

65

### 66 *Sampling design and data collection*

67 With no prior knowledge, IDT and RRR surveyed two regions of the Jutland Peninsula of  
68 Denmark: Thisted in the north and Klosterhede in the south (Fig 1A-C). Both study areas  
69 are located within the Permian–Cenozoic Danish Basin, which was formed by crustal

70 extension, subsidence, and local faulting [7]. This basin is bounded in the north by the  
71 seismically active, NW-SE striking fault system of the Sorgenfrei-Tornquist-Zone (STZ  
72 in Fig. 1A) and in the south by the basement blocks of the Ringkøbing–Fyn High and the  
73 Brande Graben (RFH and BG in Fig. 1A). The dominating compressional stress field is  
74 orientated primarily NW-SE (Fig. 1D); direction but scatters in different regions [8,9].

75 The Thisted region (~670 km<sup>2</sup>) included parts of the Thy National Park. The  
76 Klosterhede region (~700 km<sup>2</sup>), included the Klosterhede plantation, the third largest  
77 forested area in Denmark. Landscapes and vegetation communities varied between the  
78 two sampling regions. Coastal dunes dominated the Thisted region, whereas a mix of  
79 grasslands, pine and oak forests, and conifer plantations dominated the Klosterhede  
80 region. Agricultural lands in both regions were primarily rapeseed plantations.

81 Before surveying for RWA nests, and with no prior knowledge of the spatial  
82 distribution of tectonic faults, the two regions were subdivided into ~1000, 1000 × 1500-  
83 m grid cells. One hundred of the cells in each region were selected at random for  
84 mapping RWA nests. At each site, we used an adaptive sampling design to search for  
85 RWA nests. If no RWA nests were encountered within an initial 30-minute sampling  
86 period, we considered RWA to be absent from the grid cell. However, if a RWA nest was  
87 encountered within an initial 30 minutes of searching, the survey was continued for an  
88 additional 30 minutes; this process was repeated until no new nests were found within the  
89 survey grid cell boundaries. The location of each RWA nest found was recorded using a  
90 Garmin Oregon 600 GPS unit (Garmin Olathe, Kansas, USA); three individual worker  
91 ants were collected for subsequent species identification. Voucher specimens were  
92 deposited in the Natural History Museum of Denmark, Copenhagen.

93 GMB and MBB synthesized published data on geotectonic structures of the two  
94 study areas (details in Supplementary Online Material) with tectonic maps provided by  
95 Stig Pedersen (Geological Survey of Denmark) and the GEUS Map Server [10]; they did  
96 so with no knowledge of the distributions of the RWA nest data collected by IDT and  
97 RRR.

98

### 99 *Spatial data and analyses*

100 Spatial clustering of RWA nests was examined with Ripley's  $K$  [11]. The distance from  
101 each nest to the nearest fault line was calculated using the "distmap" function in the  
102 "spstat" library [12] using R (version 3.3.1) [13]. We then estimated  $\rho$ : the effect of the  
103 spatial covariate (*i.e.*, distance to faults) on the spatial intensity of the locations of the ant  
104 nests and the locations of cells without ants [14]. Finally, we used a Komlogrov-Smirnov  
105 (K-S) test to test if observed RWA nests were closer to faults than locations sampled (*i.e.*  
106 the center of the sampled grid cell) where no RWA nests were detected.

107

## 108 **Results and Discussion**

109

### 110 *RWA nests occur closer to fault lines than expected by chance*

111 RWA nests occurred in 28 of the 200 random grid cells (12 in the Thisted region and 16  
112 in the Klosterhede region). When RWA ants occurred in a sampled grid cell, there were  
113 generally  $> 1$  nest; in total we detected 273 nests of *Formica* species. All but four (one *F.*  
114 *serviformica* and three *F. fusca*) were nests of *Formica rufa*-group ants: 86% were nests  
115 of *F. polyctena* and 12% were *F. rufa*. In both regions, RWA nests were spatially

116 clustered according to Ripley's  $K$  but those cells without ants were not (see  
117 Supplementary Online Material).

118 Covariance of RWA nests and faults was highest within 60 m of faults (Fig. 2A),  
119 and approached zero at greater distances. In contrast, there was no observable covariance  
120 between cells without RWA nests and their distance from faults (Fig. 2B). RWA nests  
121 were approximately eight times more likely to be found at distances <60m from a fault  
122 than were cells without ants ( $K$ - $S$  test  $D= 0.373$ ,  $P <0.001$ ).

123 The directionality of a fault also affected the covariance between the spatial  
124 intensity of RWA nests and their distance to faults (Fig. 2C–2H). Specifically, at  
125 distances < 100 m from an active fault and relative to grid cells lacking ants, RWA nests  
126 were 10 times more likely along faults trending NNE–SSW (Fig. 2F) and up to eight  
127 times more likely on faults trending NW–SE or NNW–SSE (Fig. 2C, 2D). These  
128 directions are associated with the present-day main tectonic stress field and its scattering  
129 directions [9]. In contrast, RWA ants were only 2–4 times more likely to faults trending  
130 NE–SW or WNW–ESE (Fig. 2E, 2G), and did not occur adjacent to faults trending ENE–  
131 WSW (Fig. 2H).

132

133 *On the use of double-blind studies in ecology*

134 The scientific method emphasizes accurate, unbiased, and objective experiments or  
135 observations. Because research results can be biased by design or our underlying belief in  
136 the correctness of our hypothesis (confirmation bias: [15]), repeatable results and reliable  
137 conclusions require that investigators do as much as possible to minimize bias in all

138 aspects of a research project (e.g., [16]). Double-blind designs provide the gold-standard  
139 for unbiased experiments [5].

140         In the interest of avoiding bias and increasing the repeatability and reliability of  
141 ecological research, we suggest that the benefits of double-blind studies far outweigh the  
142 additional costs and logistical complications of creating blinded research teams. The need  
143 for multiple research teams leads directly to increased costs and the additional project  
144 coordination. Trade-offs among personnel, sampling effort, and sampling intensity  
145 depend on available resources. In our study, for example, we reduced sampling effort by  
146 randomly, not exhaustively, sampling the ~1400 km<sup>2</sup> of the pre-defined study regions. A  
147 second cost of a double-blind study such as ones focused on species occurrences is the  
148 general tendency to focus on where a species occurs, as opposed to where it does not. For  
149 example, most species distribution models are based only on “presence-only” data, as  
150 absences are rarely recorded [17]. Yet as we have shown here, the samples of locations  
151 lacking RWA nests were crucial for determining whether RWA nests and fault systems  
152 had meaningful patterns of covariance.

153         Double-blind experiments remain rare in ecology [5] but their importance cannot  
154 be overestimated. Results and conclusions of double-blind studies are unlikely to be  
155 biased by the views and perspectives of the researchers themselves. Investment in  
156 appropriately replicated double-blind studies also may be more cost-effective because  
157 they rarely need to be repeated, even if the results are unexpected. Just as double-blind  
158 studies in medicine have led to reliable treatments that for injury and disease, double-  
159 blind studies in ecology will provide us with high-quality unbiased data of how the  
160 natural world is structured and is changing.

161

162 **Funding**

163 IDT was supported by a National Science Foundation Postdoctoral Research Fellowship;

164 NSF grant DEB-1136646 to AME; NJS was supported by a National Science

165 Foundation Dimensions of Biodiversity grant (NSF-1136703).

166

167 **References**

168 1. Hölldobler, B. & Wilson, E. O. 1990 *The Ants*. Cambridge: Harvard University

169 Press.

170 2. Lach, L., Parr, C. & Abbott, K. 2010 *Ant Ecology*. Oxford: Oxford University

171 Press.

172 3. Berberich, G. & Schreiber, U. 2013 *GeoBioScience*: Red wood ants as

173 bioindicators for active tectonic fault systems in the West Eifel (Germany).

174 *Animals* **3**, 475–498. (doi:10.3390/ani3020475)

175 4. Berberich, G., Grumpe, A., Berberich, M., Klimetzek, D. & Wöhler, C. 2016 Are

176 red wood ants (*Formica rufa*-group) tectonic indicators? A statistical approach.

177 *Ecol. Indic.* **61**, 968–979. (doi:10.1016/j.ecolind.2015.10.055)

178 5. Holman, L., Head, M. L., Lanfear, R. & Jennions, M. D. 2015 Evidence of

179 experimental bias in the life sciences: Why we need blind data recording. *PLoS*

180 *Biol.* **13**. (doi:10.1371/journal.pbio.1002190)

181 6. Kardish, M. R., Mueller, U. G., Amador-Vargas, S., Dietrich, E. I., Ma, R., Barrett,

182 B. & Fang, C.-C. 2015 Blind trust in unblinded observation in Ecology, Evolution,

183 and Behavior. *Front. Ecol. Evol.* **3**, 1–4. (doi:10.3389/fevo.2015.00051)



- 184 7. Nielsen, L. H. 2003 The Jurassic of Denmark and Greenland: Late Triassic –  
185 Jurassic development of the Danish Basin and the Fennoscandian Border Zone,  
186 southern Scandinavia. *Geol. Surv. Denmark Greenl. Bull.* **1**, 459–526.
- 187 8. Gregersen, Sø. 2002 Earthquakes and change of stress since the ice age  
188 in Scandinavia. *Bull. Geological Society Denmark* **49**, 73–78.
- 189 9. Helmholtz Centre Potsdam - GFZ German Research Centre for Geosciences 2008  
190 The World Stress Map Project - A Service for Earth System Management.
- 191 10. The Geological Survey of Denmark and Greenland 2015 GEUS Server: Geologisk  
192 Kort over the Danske Undergrund.
- 193 11. Ripley, B. D. 1977 Modelling spatial patterns. *J. R. Stat. Soc. Ser. B.* **39**, 172–212.  
194 (doi:10.1046/j.1369-7412.2003.05285.x)
- 195 12. Baddeley, A., Rubak, E. & Turner, R. 2015 Spatial Point Patterns: Methodology  
196 and Applications with R.
- 197 13. Team, R. C. 2016 R: A Language and Environment for Statistical Computing.
- 198 14. Baddeley, a, Chang, Y. M., Y., S. & Turner, R. 2012 Nonparametric estimation of  
199 the dependence of a spatial point process on spatial covariates. *Stat. Interface* **5**,  
200 221–236. (doi:10.4310/SII.2012.v5.n2.a7)
- 201 15. Nickerson, R. S. 1998 Confirmation bias: A ubiquitous phenomenon in many  
202 guises. *Rev. Gen. Psychol.* **2**, 175–220. (doi:10.1037/1089-2680.2.2.175)
- 203 16. Rosenthal, R. & Rosnow, R. 2007 *Essentials of Behavioral Research: Methods*  
204 *and Data Analysis*. New York: McGraw-Hill.
- 205 17. Berberich, G. M., Dormann, C. F., Klimetzek, D., Berberich, M. B., Sanders, N. J.  
206 & Ellison, A. M. 2016 Detection probabilities for sessile organisms. *Ecosphere* **7**,

- 207 e01546–n/a. (doi:10.1002/ecs2.1546)
- 208 18. Vejbæk, O. V. 1997 Dybe strukturer i danske sedimentære bassiner. *Geol. Tidsskr.*  
209 **4**, 1–31.
- 210 19. Petersen, H. I., Nielsen, L. H., Bojesen-Koefoed, J., Mathiesen, a, Kristensen, L.  
211 & Dalhoff, F. 2008 *Evaluation of the quality, thermal maturity and distribution of*  
212 *potential source rocks in the Danish part of the Norwegian–Danish Basin.*
- 213 20. Cotte, N. et al. 2002 Sharp contrast in lithospheric structure across the Sorgenfrei-  
214 Tornquist Zone as inferred by Rayleigh wave analysis of TOR1 project data.  
215 *Tectonophysics* **360**, 75–88. (doi:10.1016/S0040-1951(02)00348-7)
- 216
- 217
- 218
- 219
- 220
- 221
- 222
- 223
- 224
- 225
- 226
- 227
- 228
- 229

230 **Table 1: Examples of reviewer's comments on relationship of faults with RWA nests**

|            |                                                                                                                                                                                                                                                                                                                                       |
|------------|---------------------------------------------------------------------------------------------------------------------------------------------------------------------------------------------------------------------------------------------------------------------------------------------------------------------------------------|
| Reviewer#1 | This paper does not control for, or even acknowledge, the diverse environmental factors that are known to affect the distribution of red wood ant nests. There has been extensive work on wood ant distribution between and within forests. The authors cannot dismiss this huge body of work with a reference to a couple of papers. |
| Reviwer#2  | The authors are ignoring basic wood ant biology - knowing what species you are working on and its basic ecological requirements is the first step for any ecological study.                                                                                                                                                           |
| Reviewer#3 | The study shows a relation between fault zones and RWA nests. No doubt. But not everywhere where RWA nests can be found are tectonically features such as in the Brandenburg region (Germany).                                                                                                                                        |

231

232

233 **Figure legends**

234 **Figure 1.** A) Map of the Jutland Peninsula, showing the two sampling regions and major  
235 tectonic units (see text for details). B) Detail of Thisted sampling region. C) Detail of  
236 Klosterhede sampling region. In (B) and (C), red points indicate sampled grid cells with  
237 RWA nests and blue points indicate sampled grid cells lacking RWA nests. D)  
238 Distribution of faults in the Jutland Peninsula (after [10,18–20]) with red and blue points  
239 indicating, respectively, presence or absence of RWA nests as in (B) and (C).

240

241 **Figure 2.** A) Spatial covariance of RWA nest distributions with tectonic fault zones in  
242 the Jutland Peninsula. B) Spatial covariance of RWA absences with tectonic fault zones  
243 C-H) Spatial covariance of RWA nest distributions with tectonic fault zones subdivided  
244 by fault zone directionality.

245

246 **Figures:**

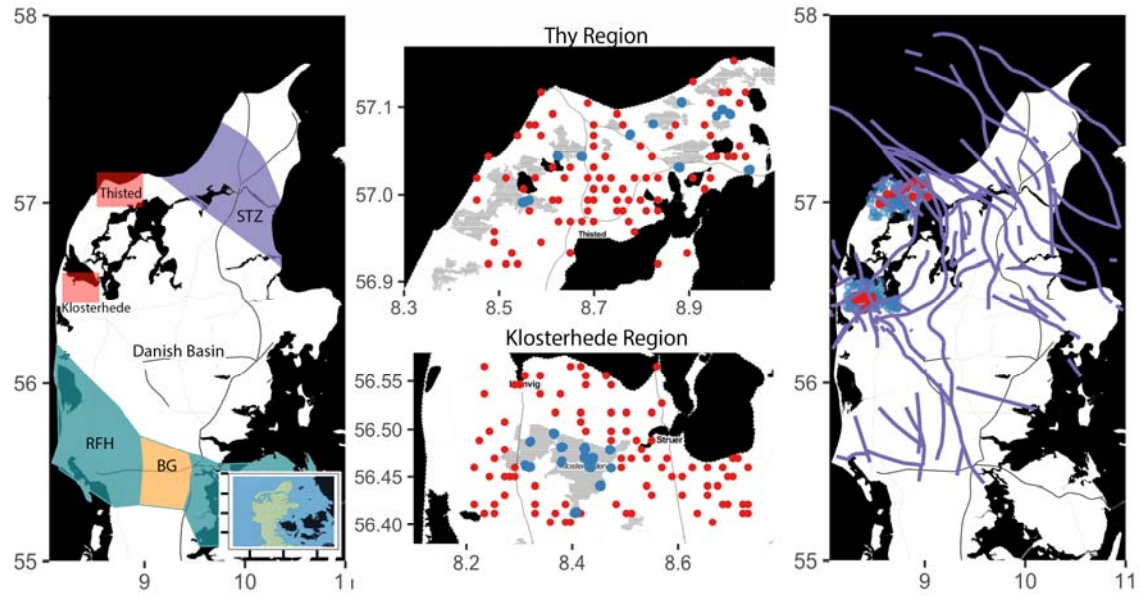

247

248

249

Figure 1.

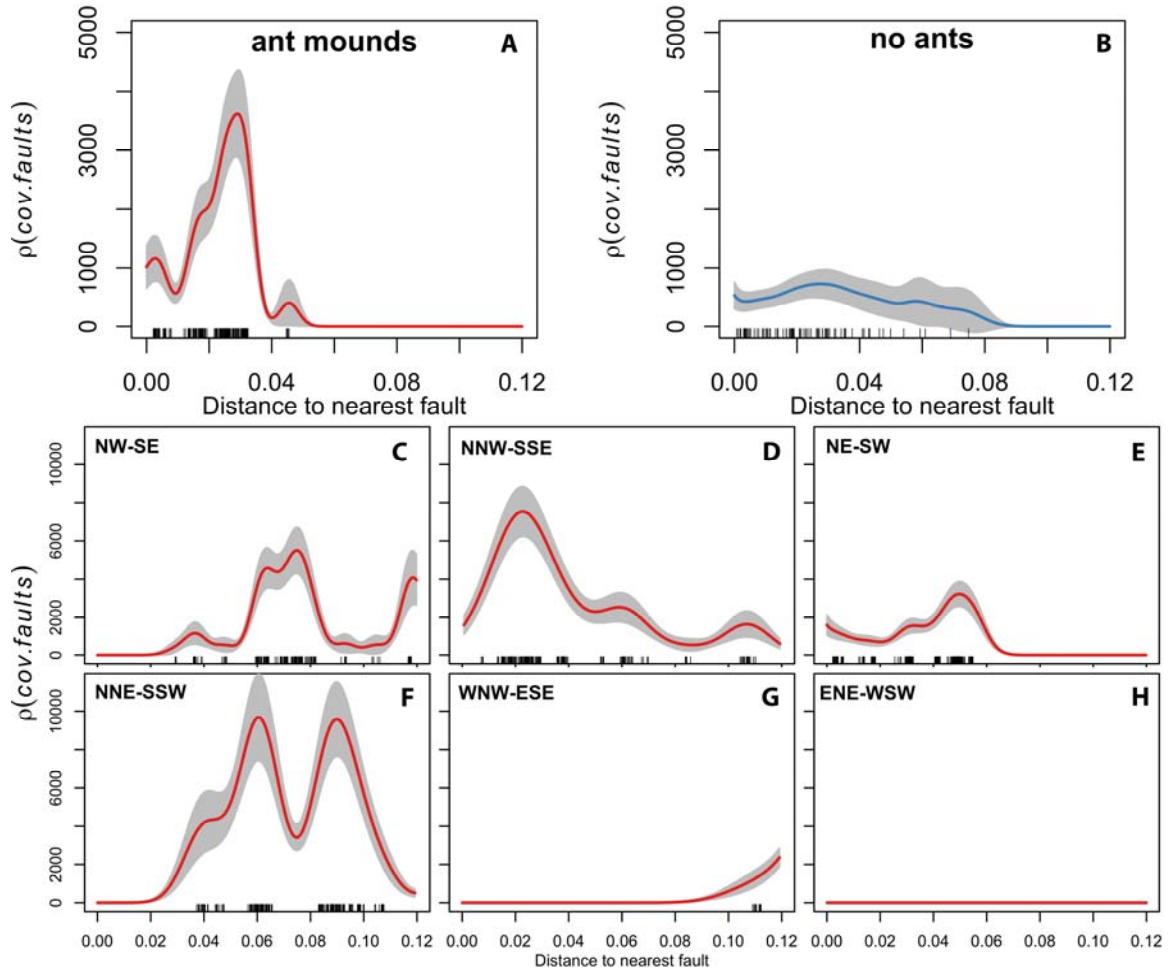

250

251

252

253

Figure 2



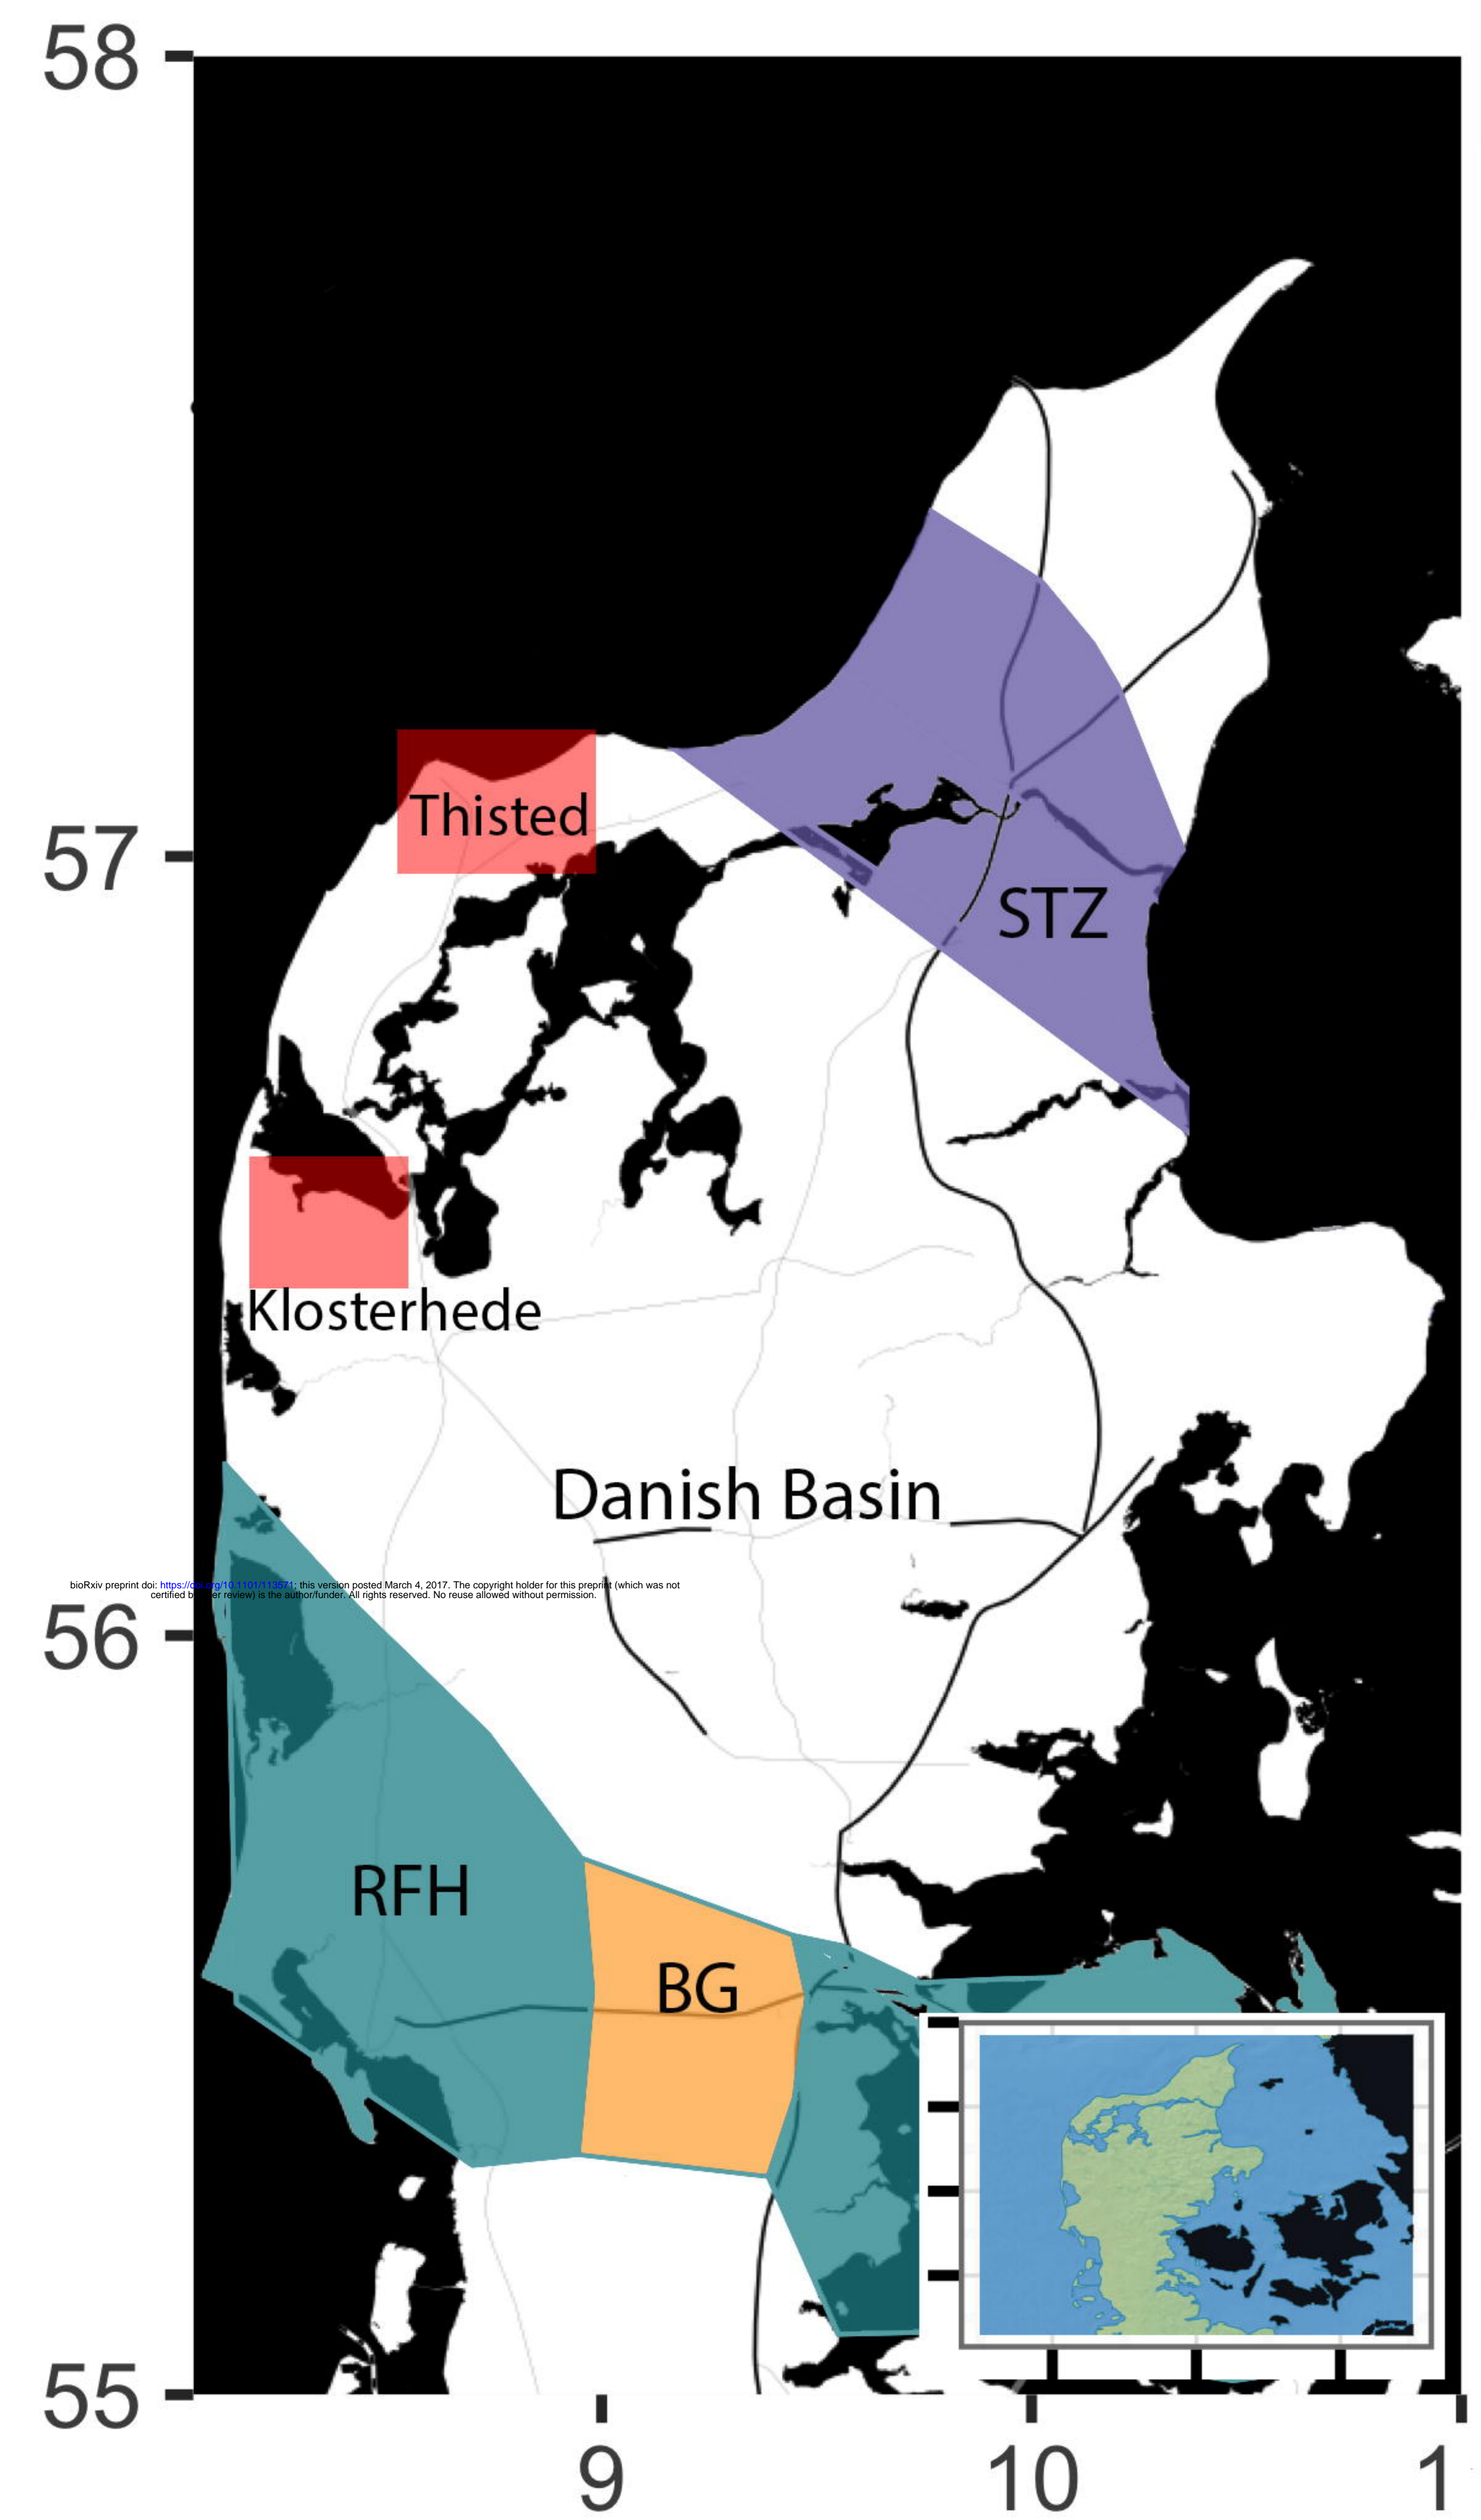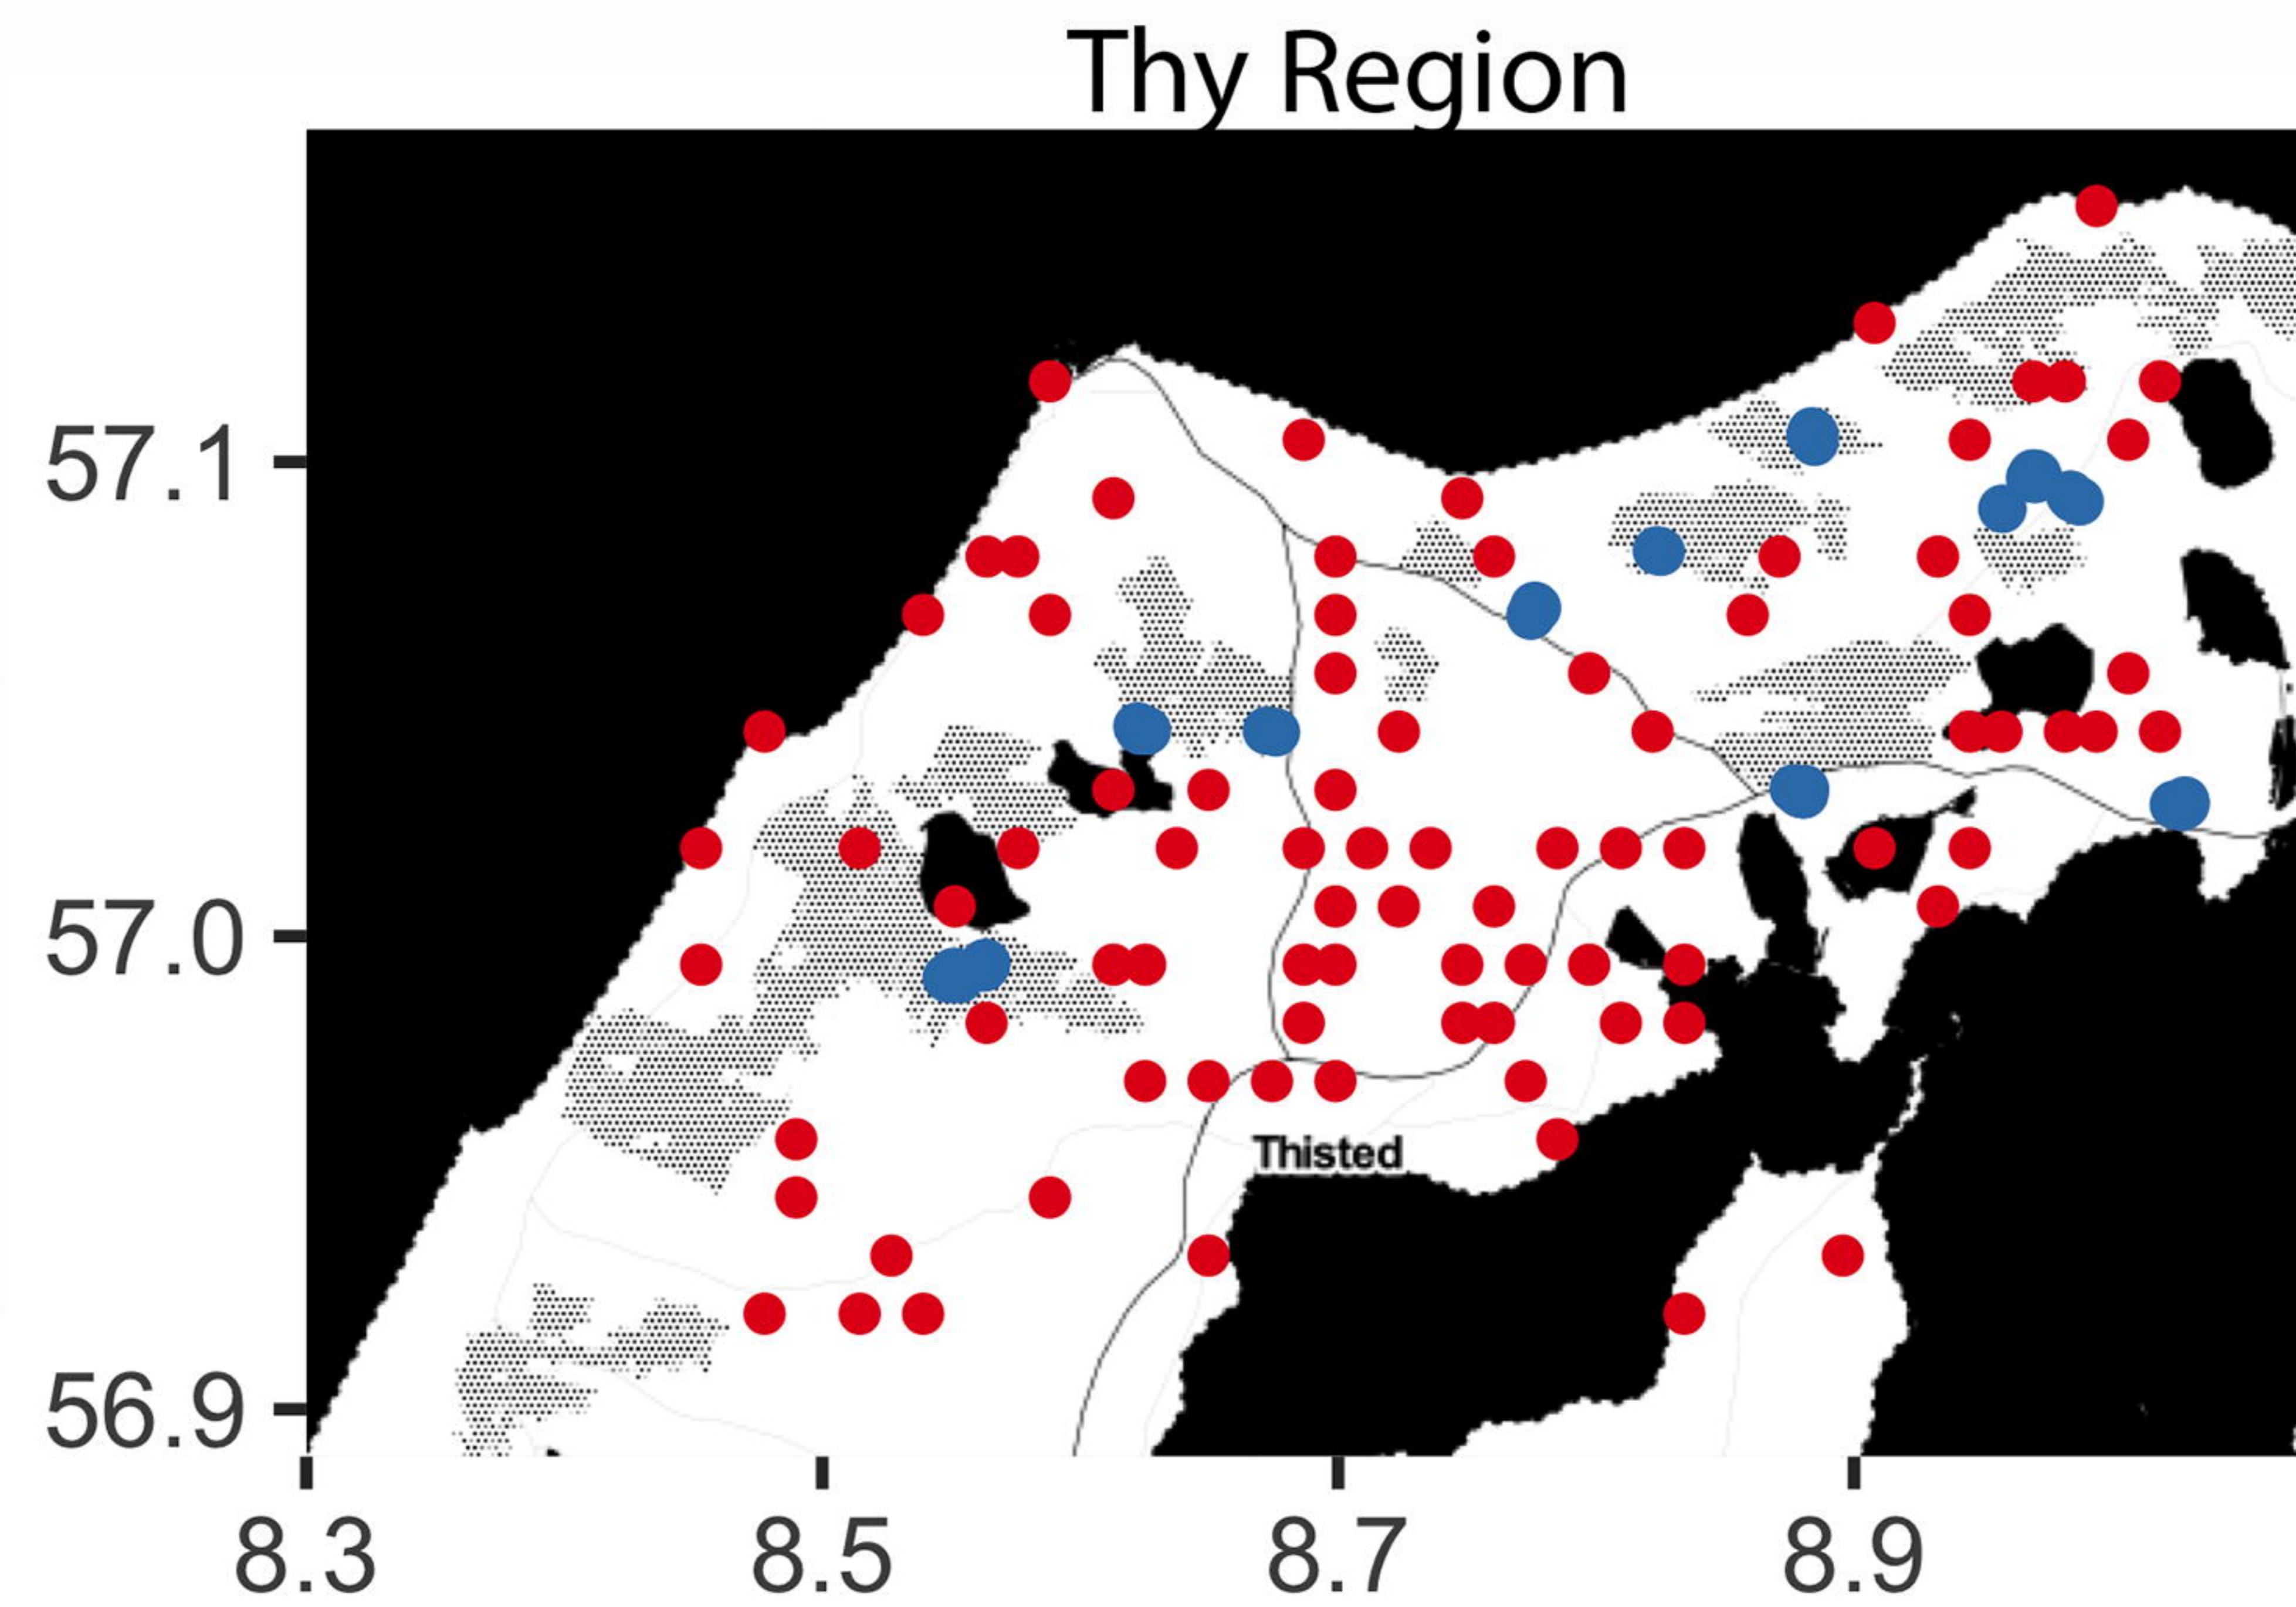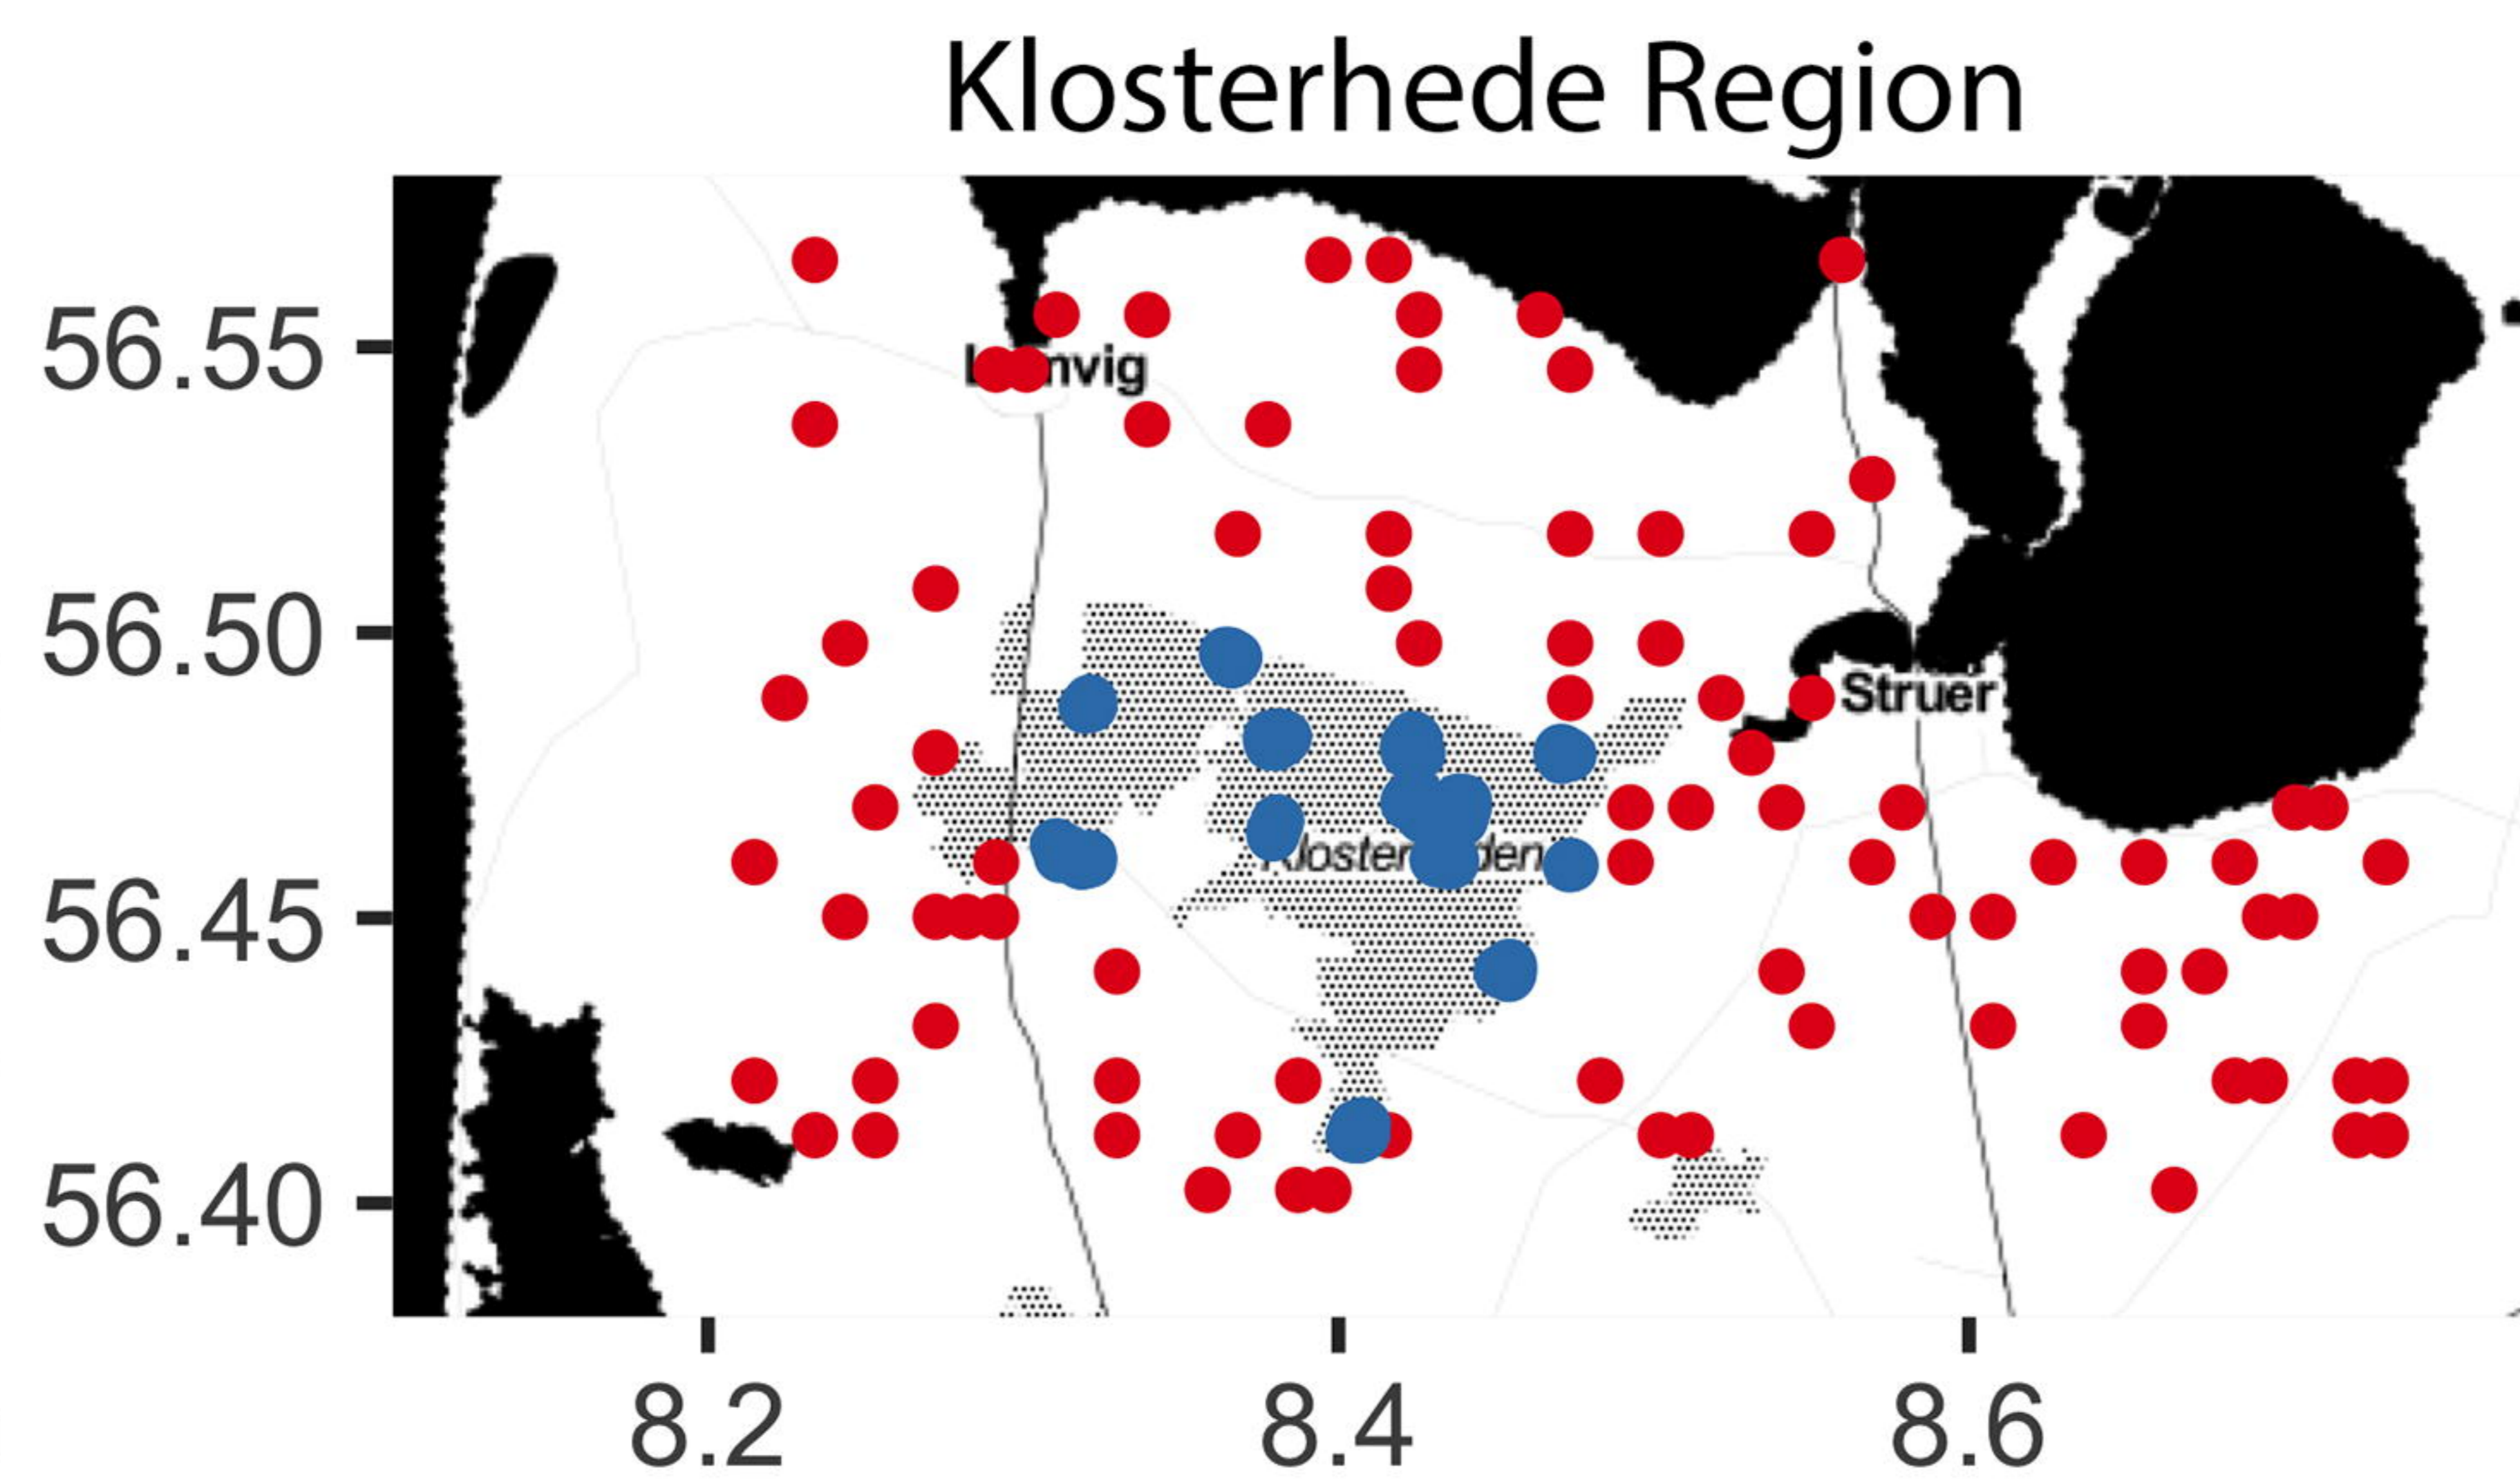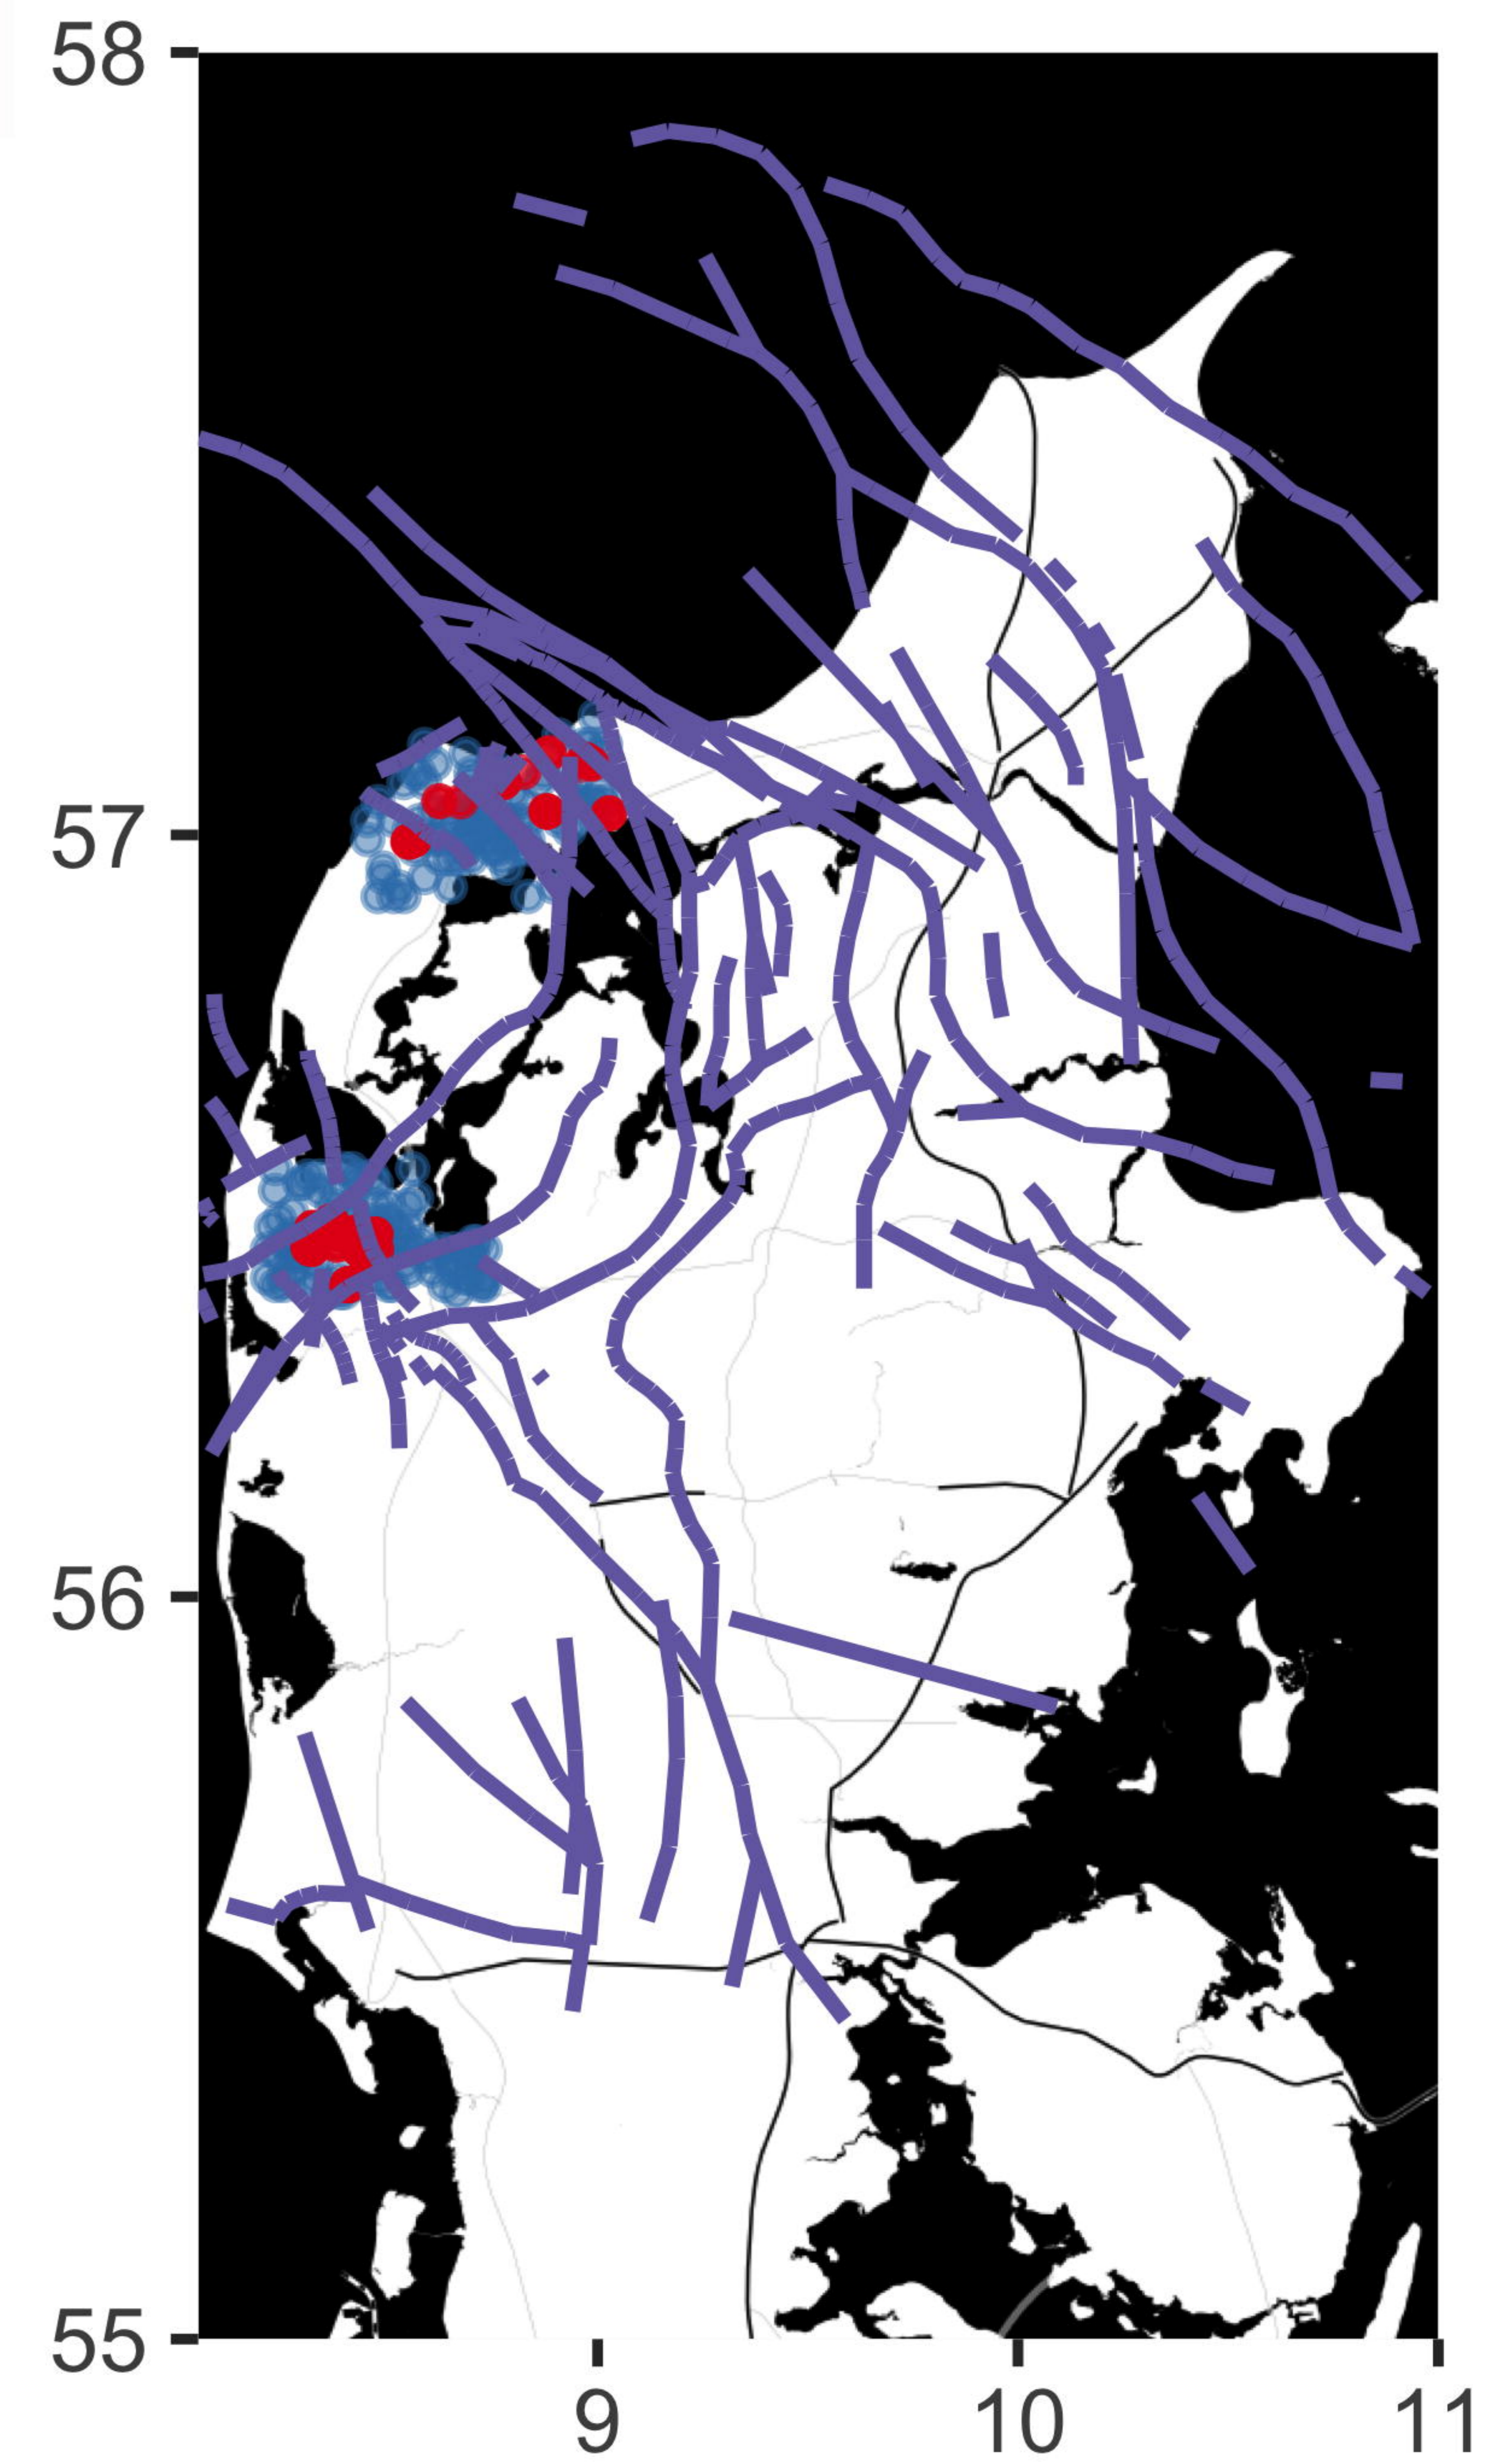



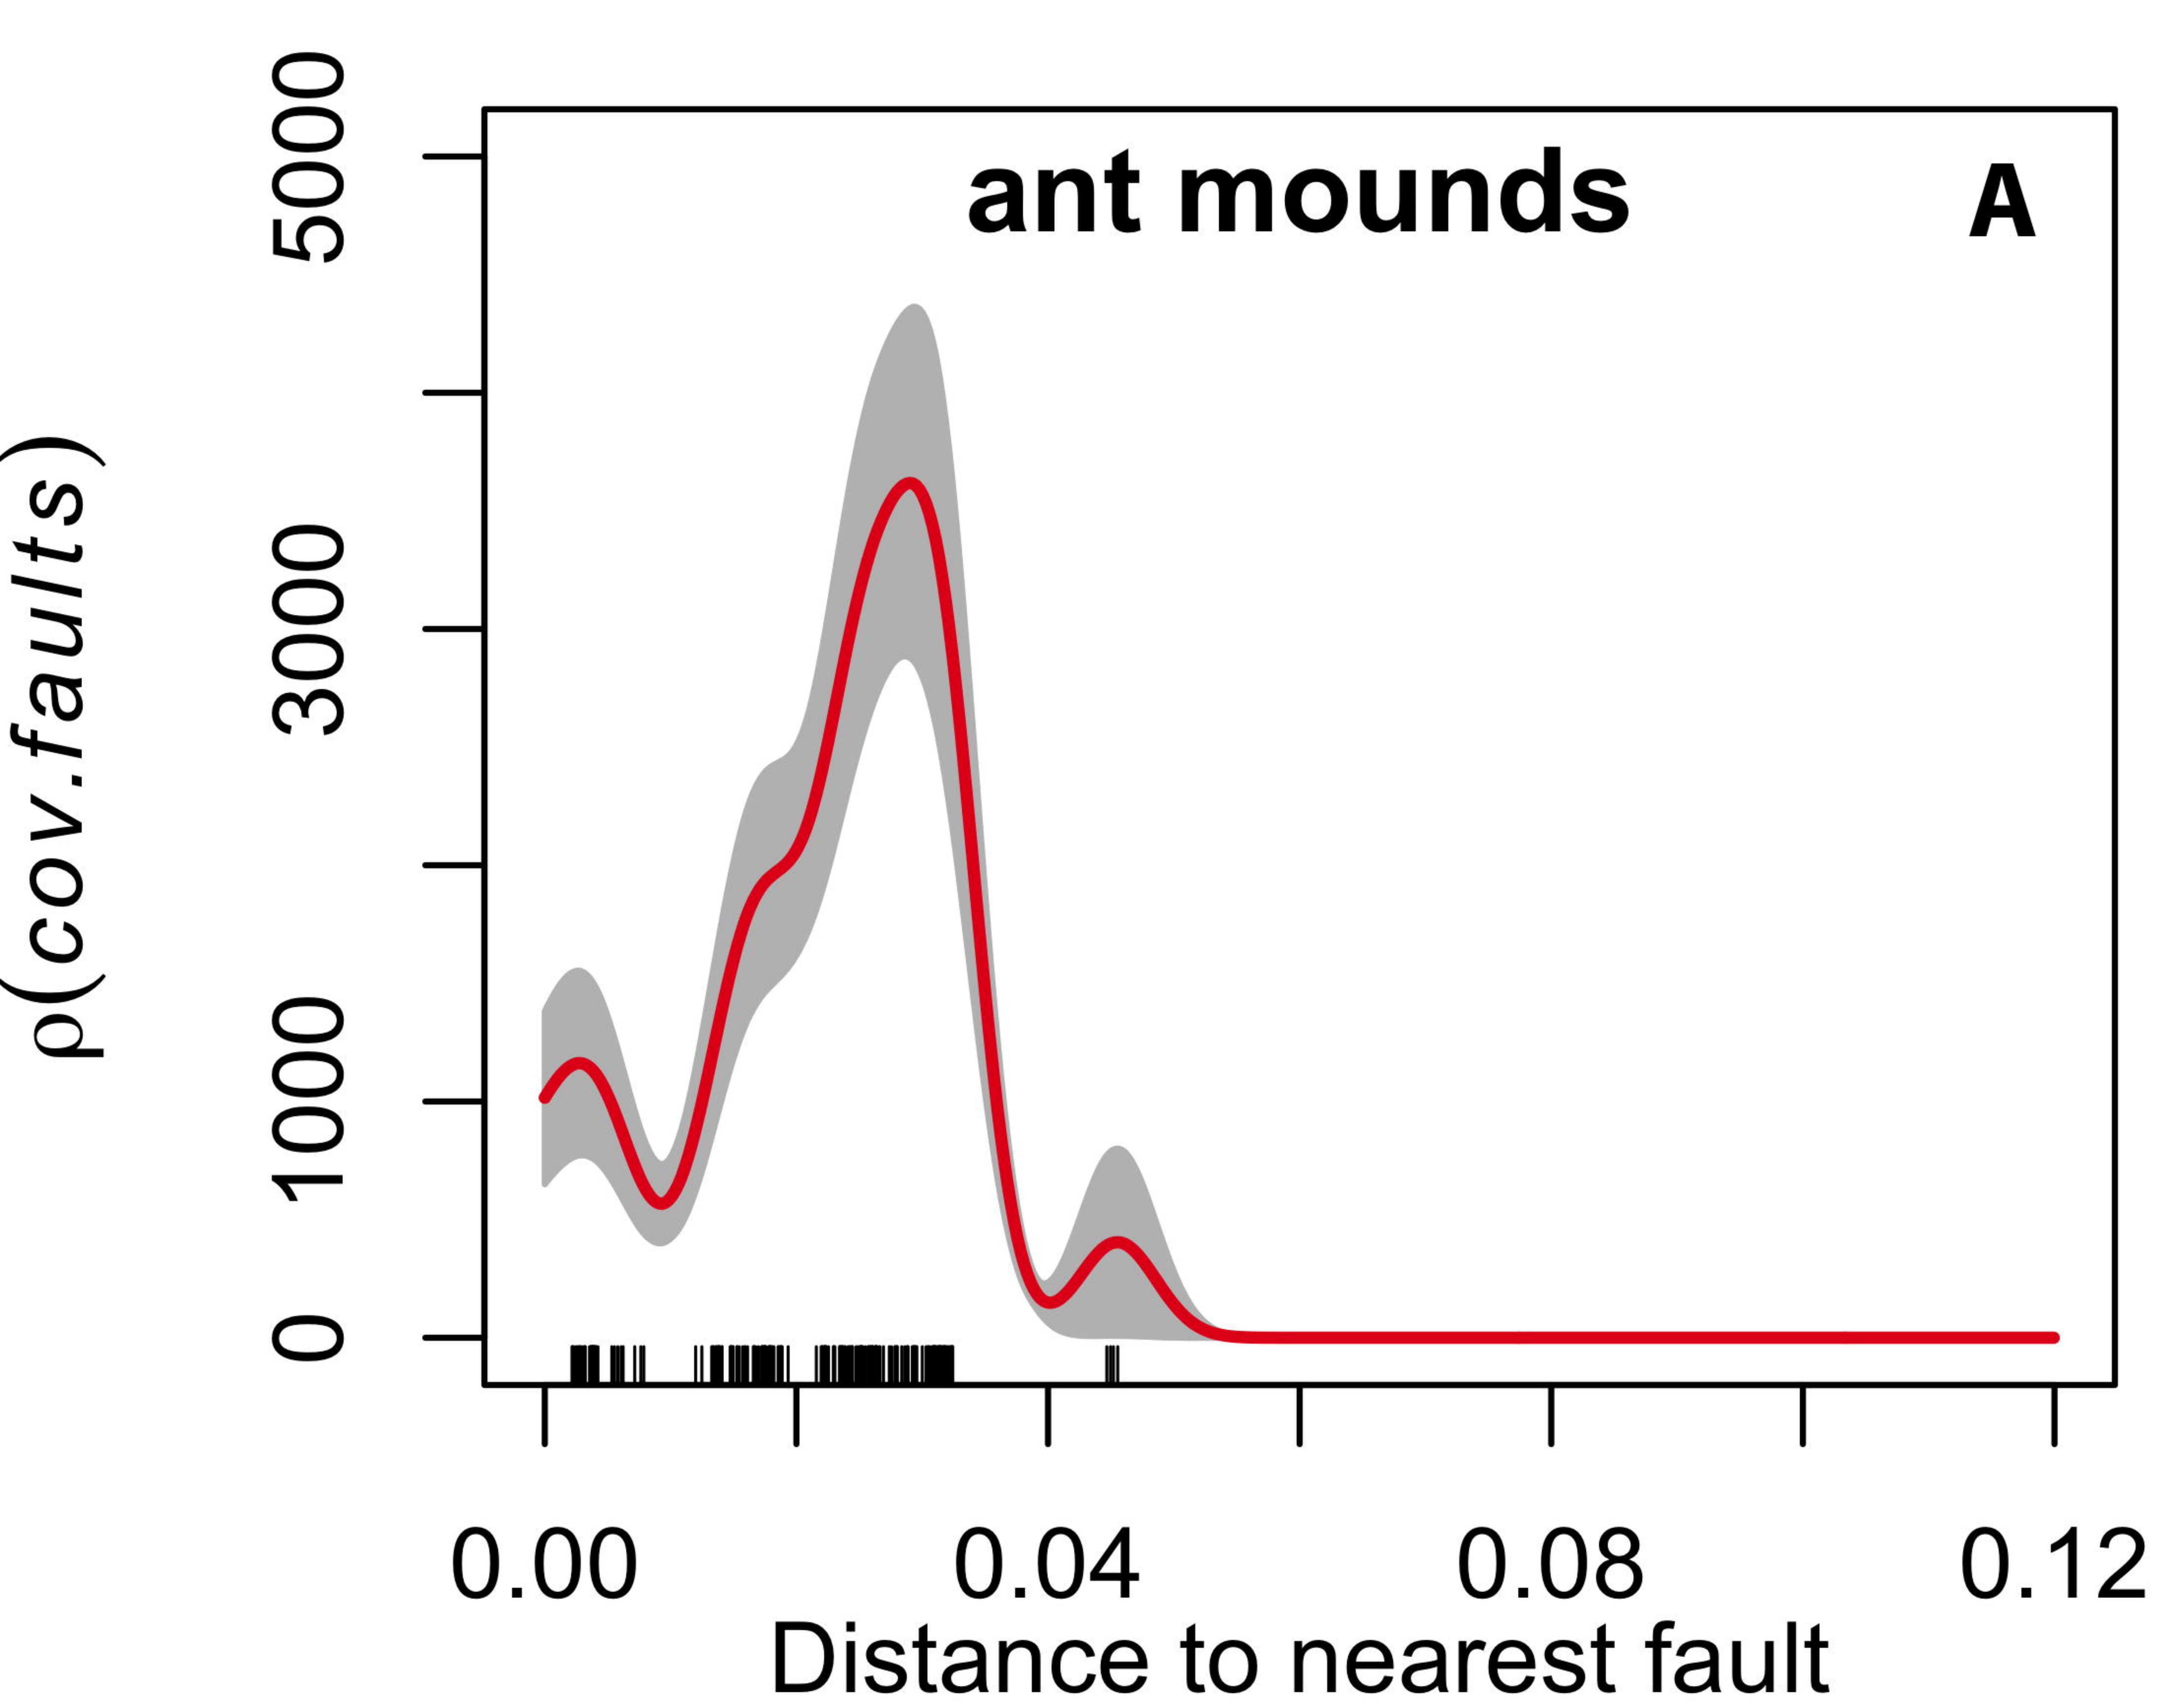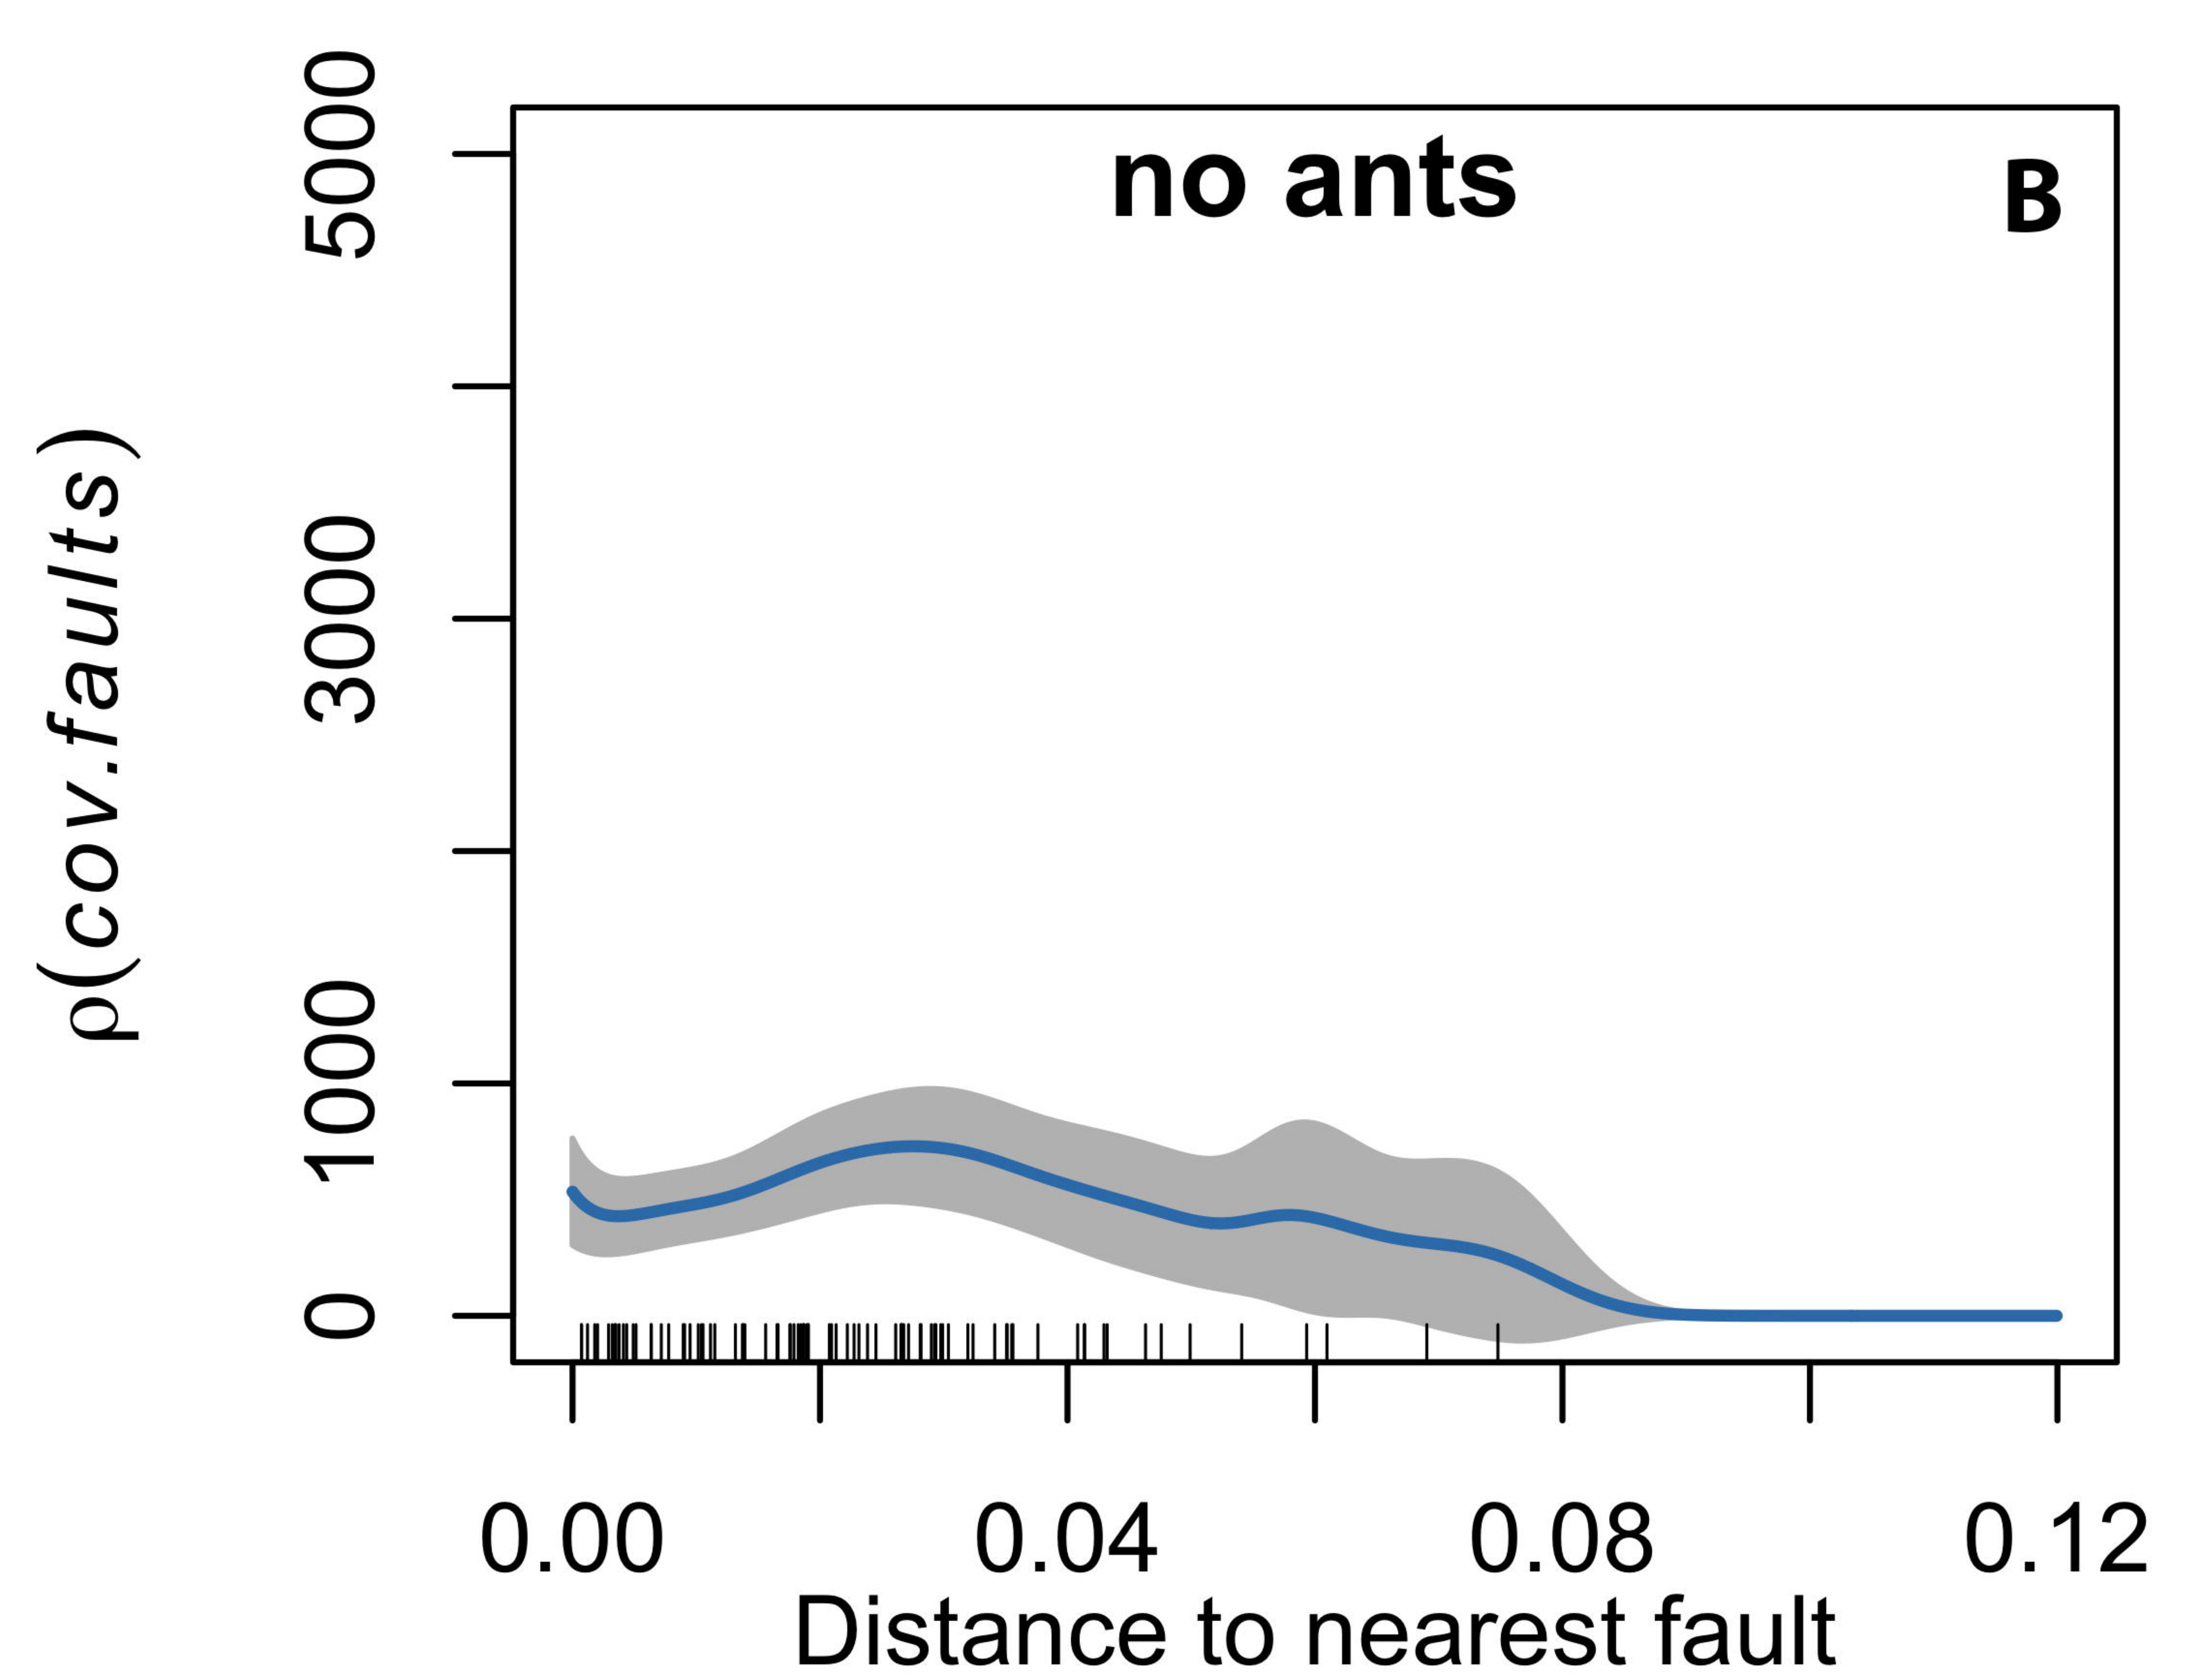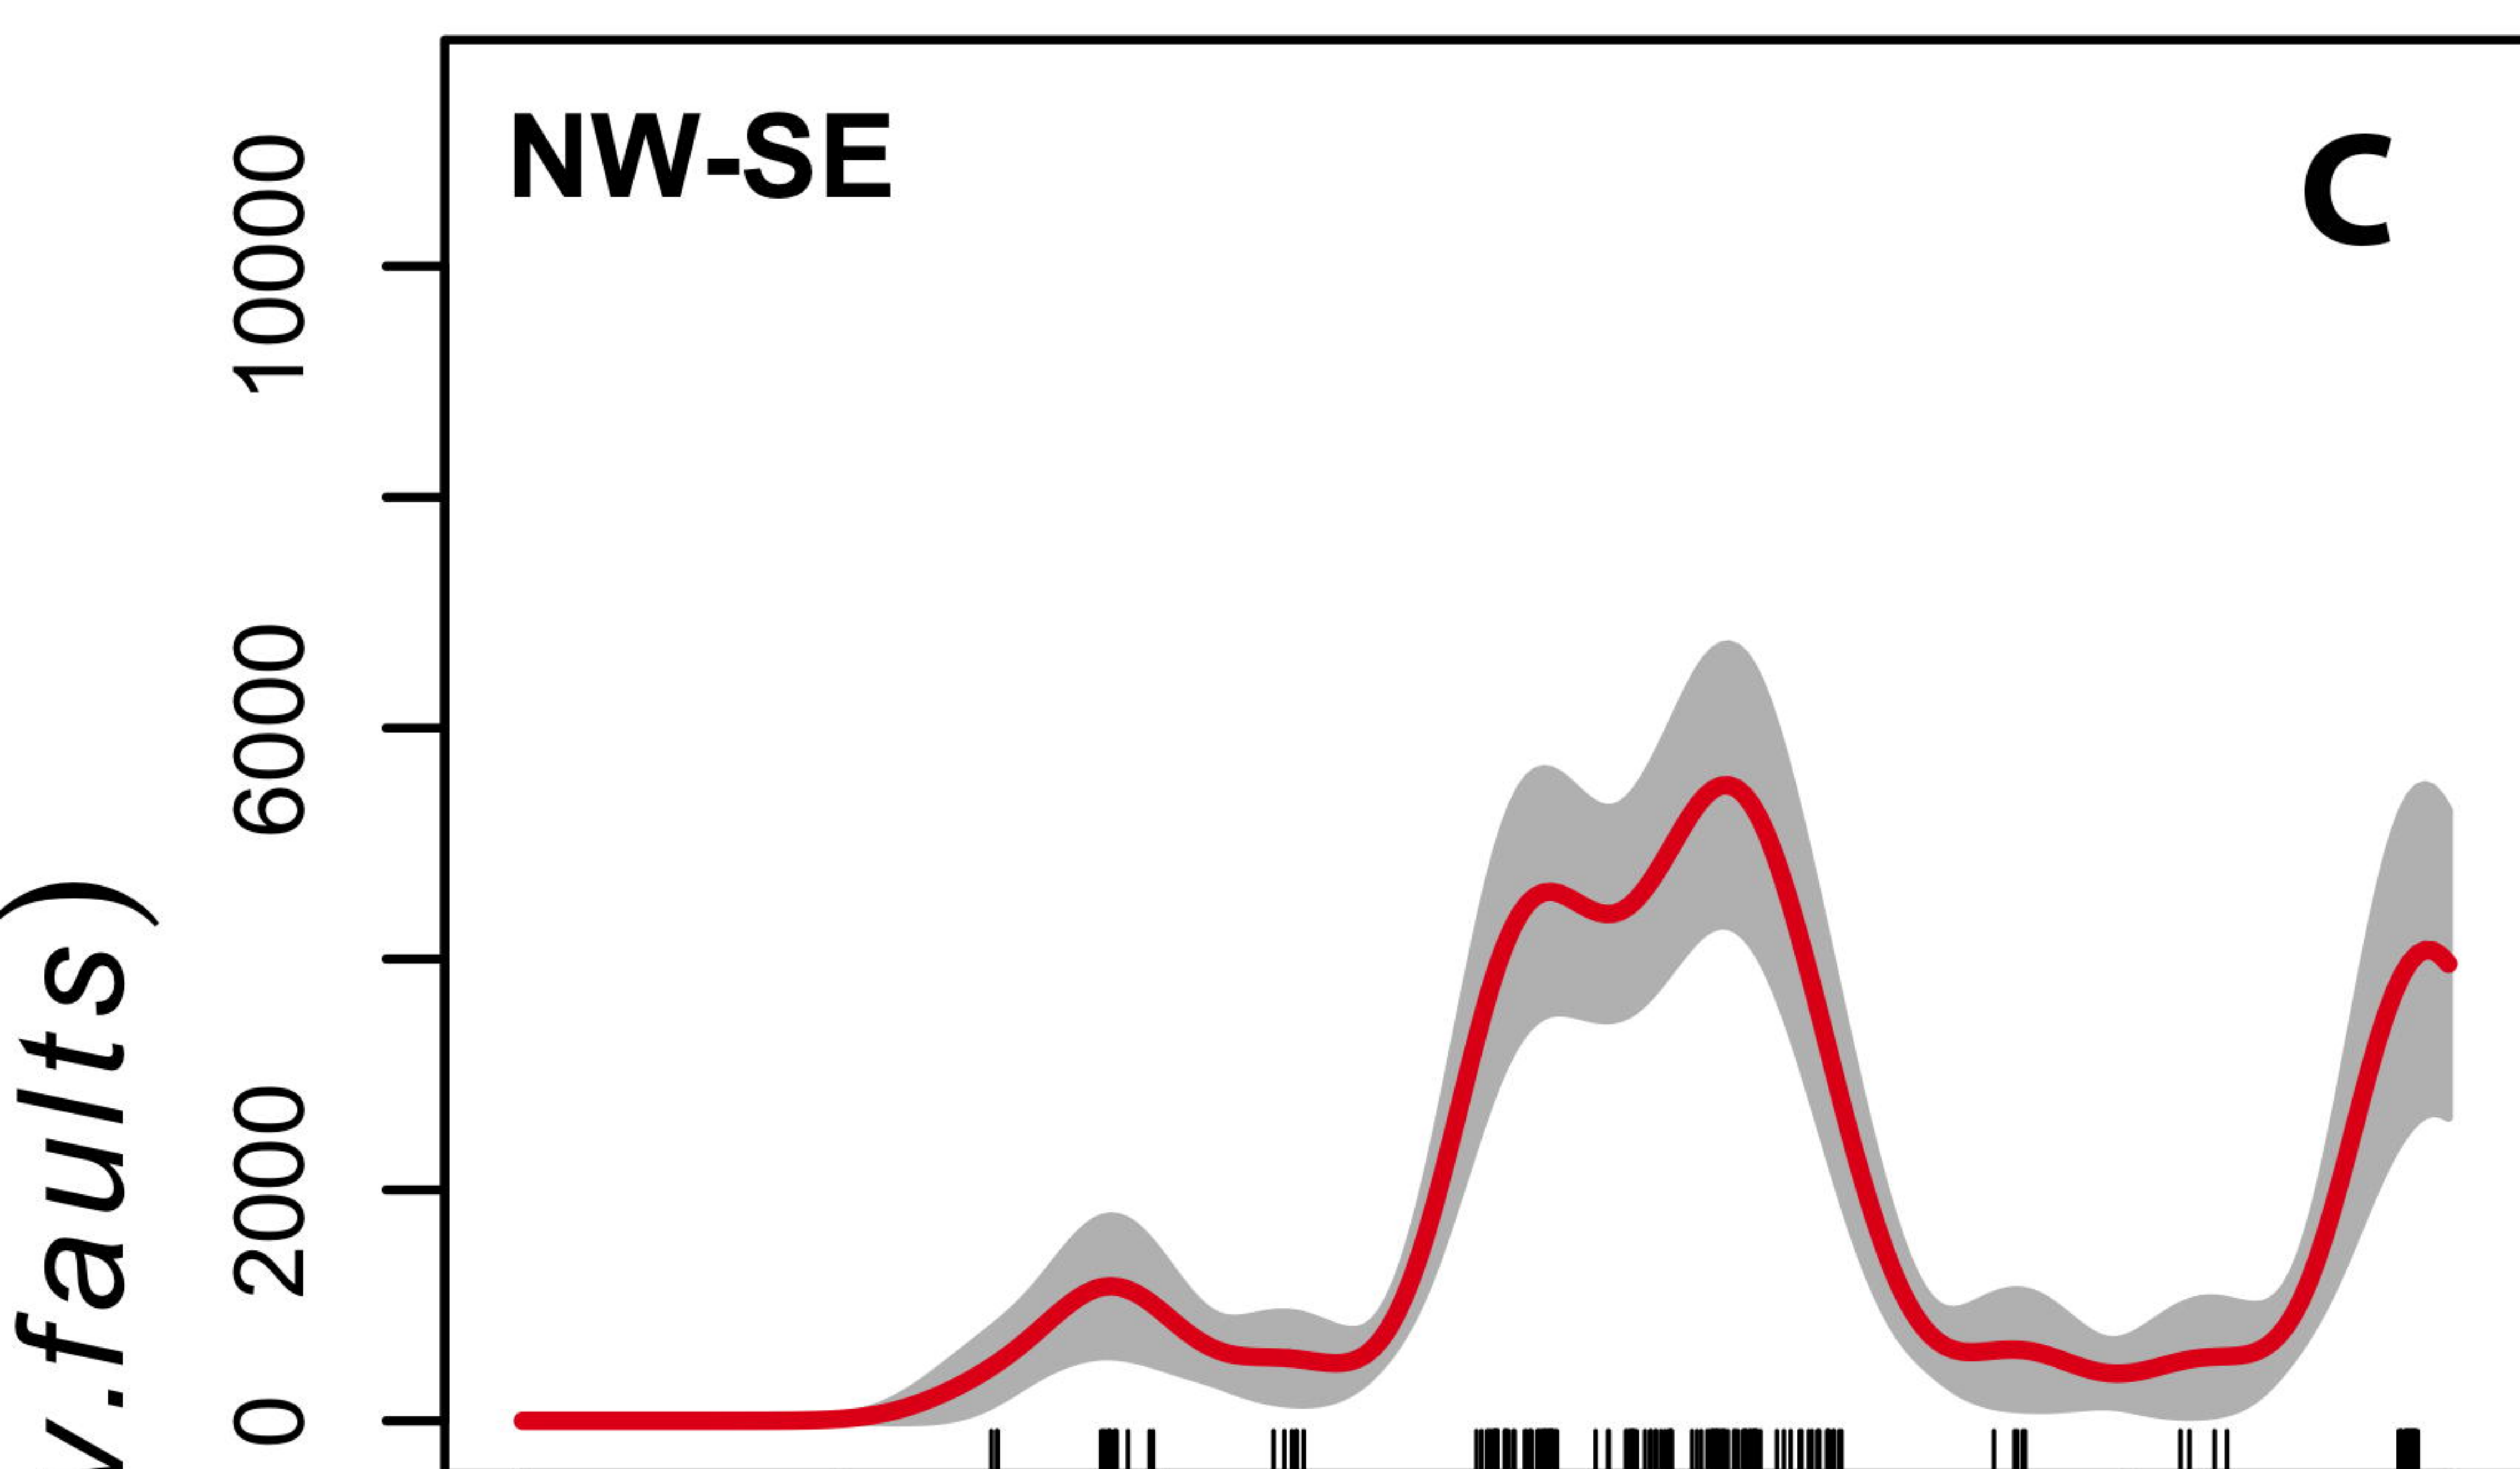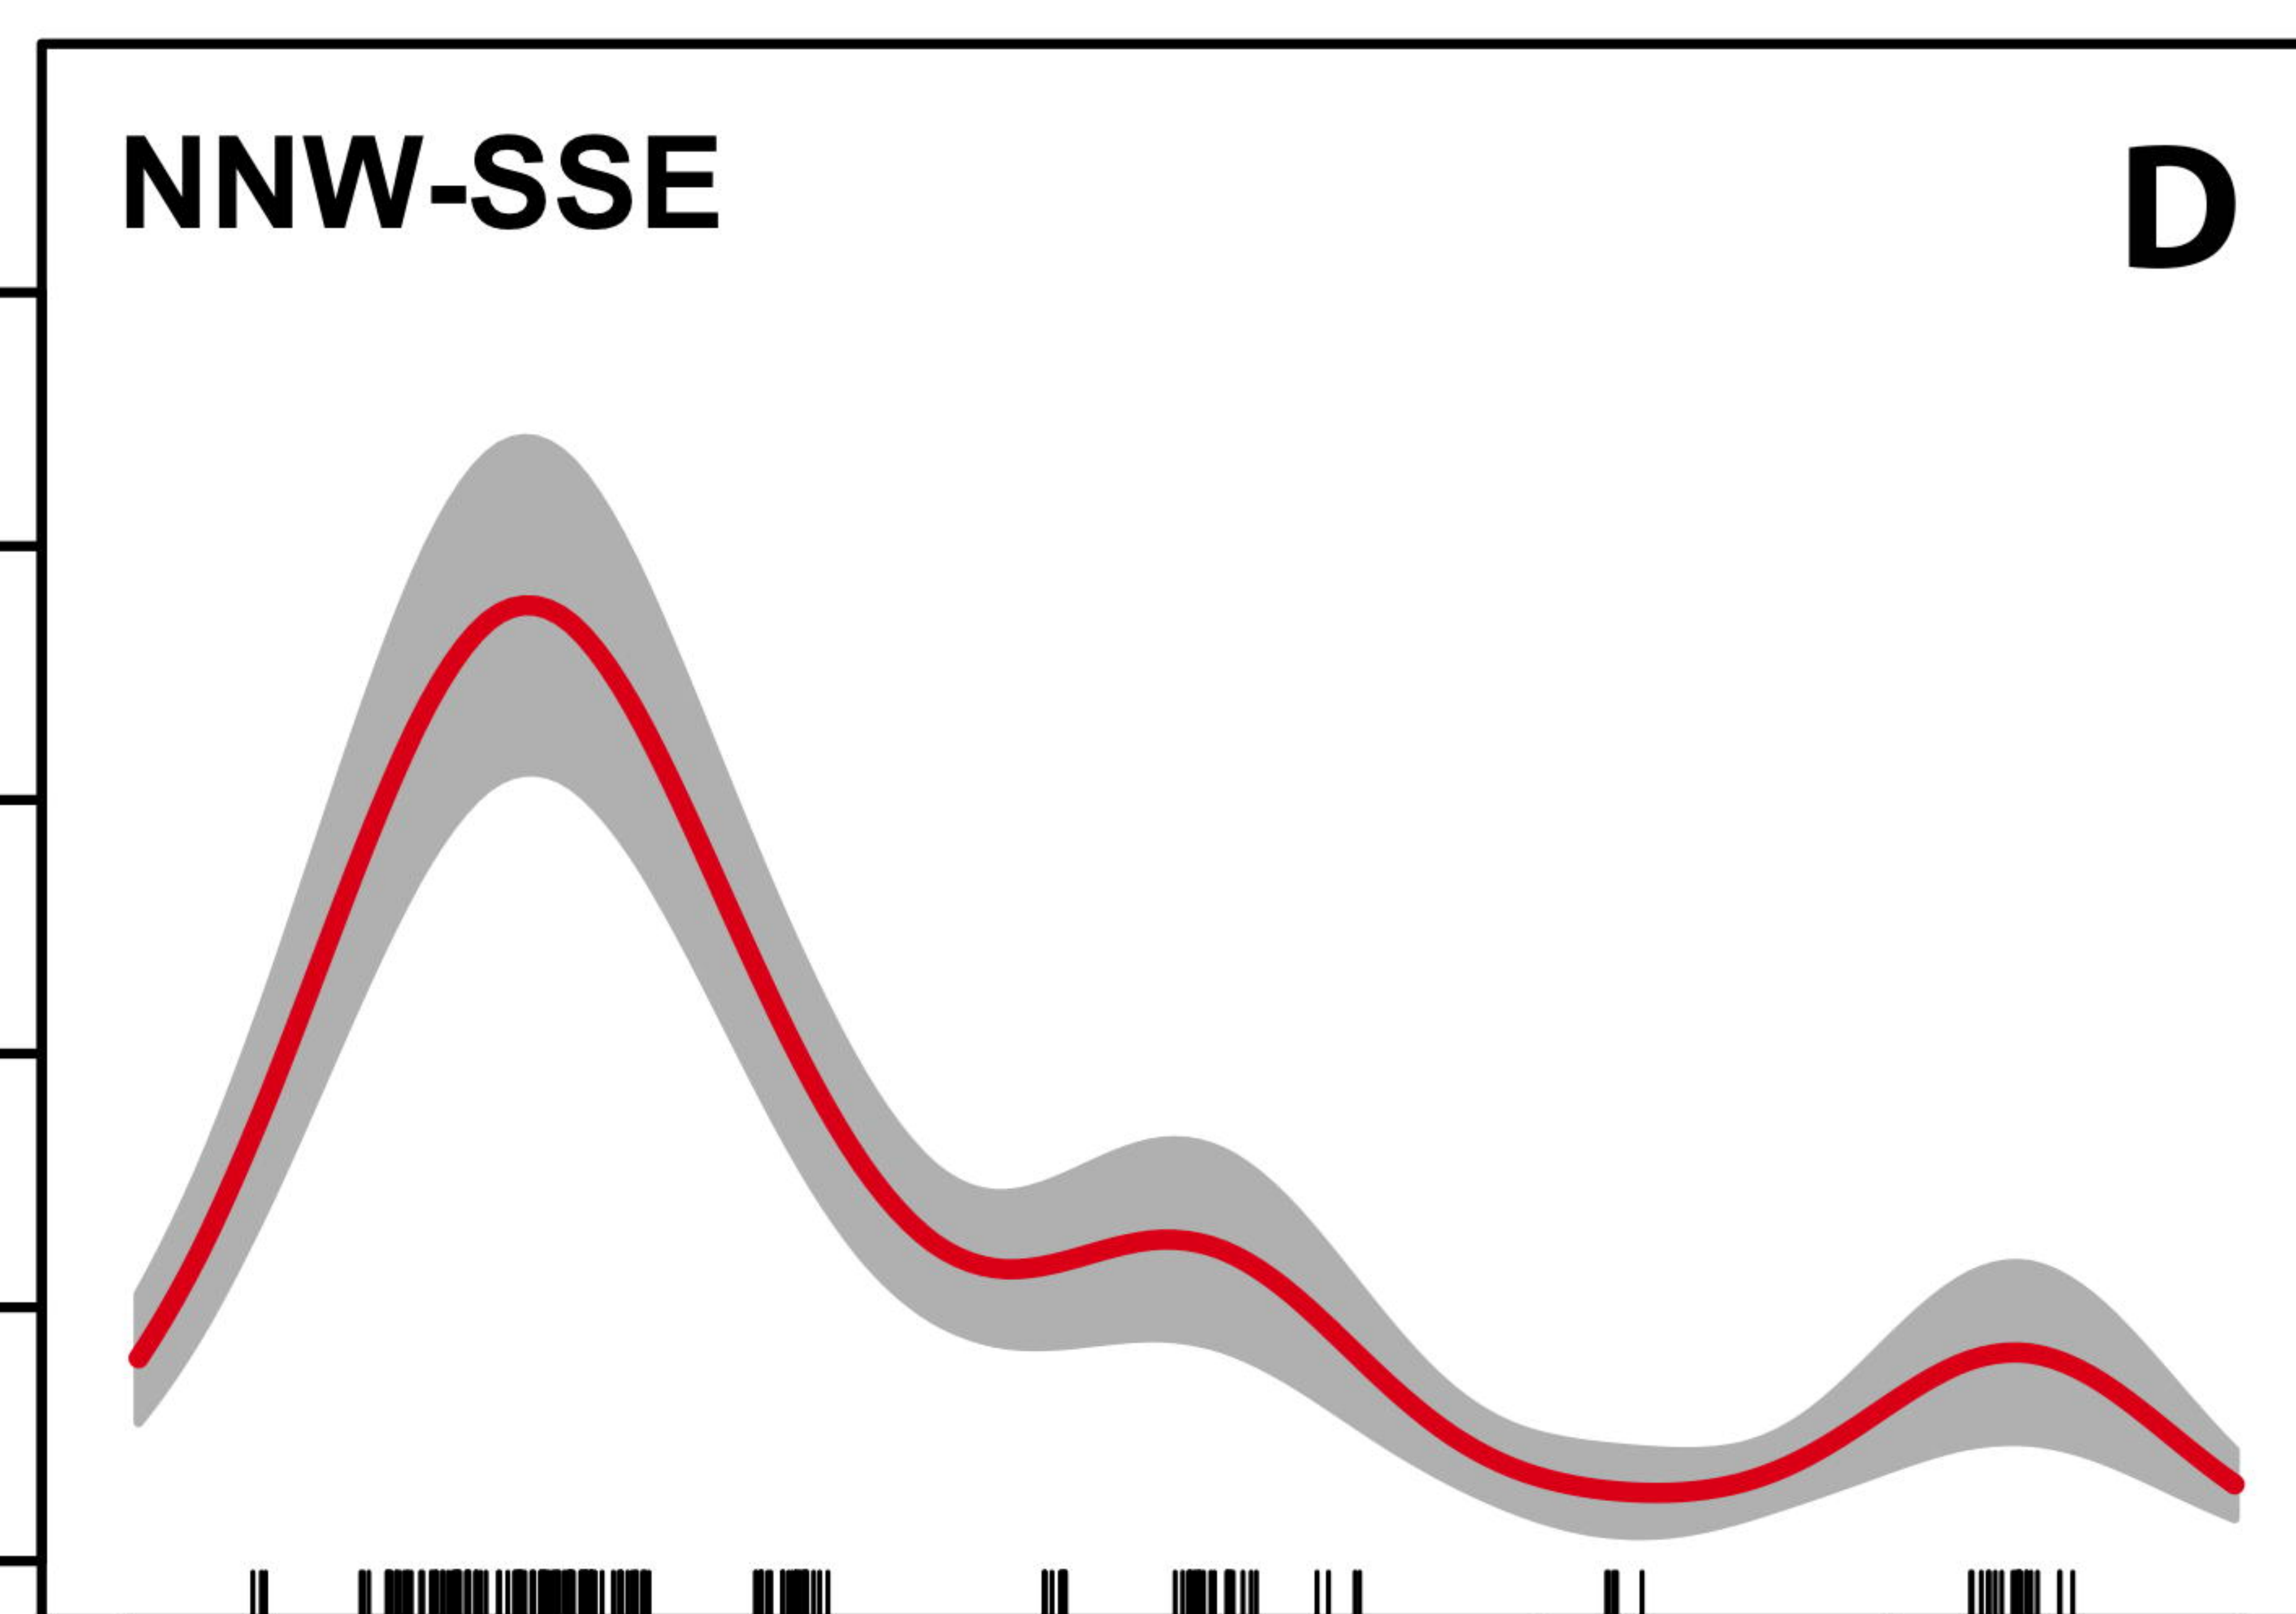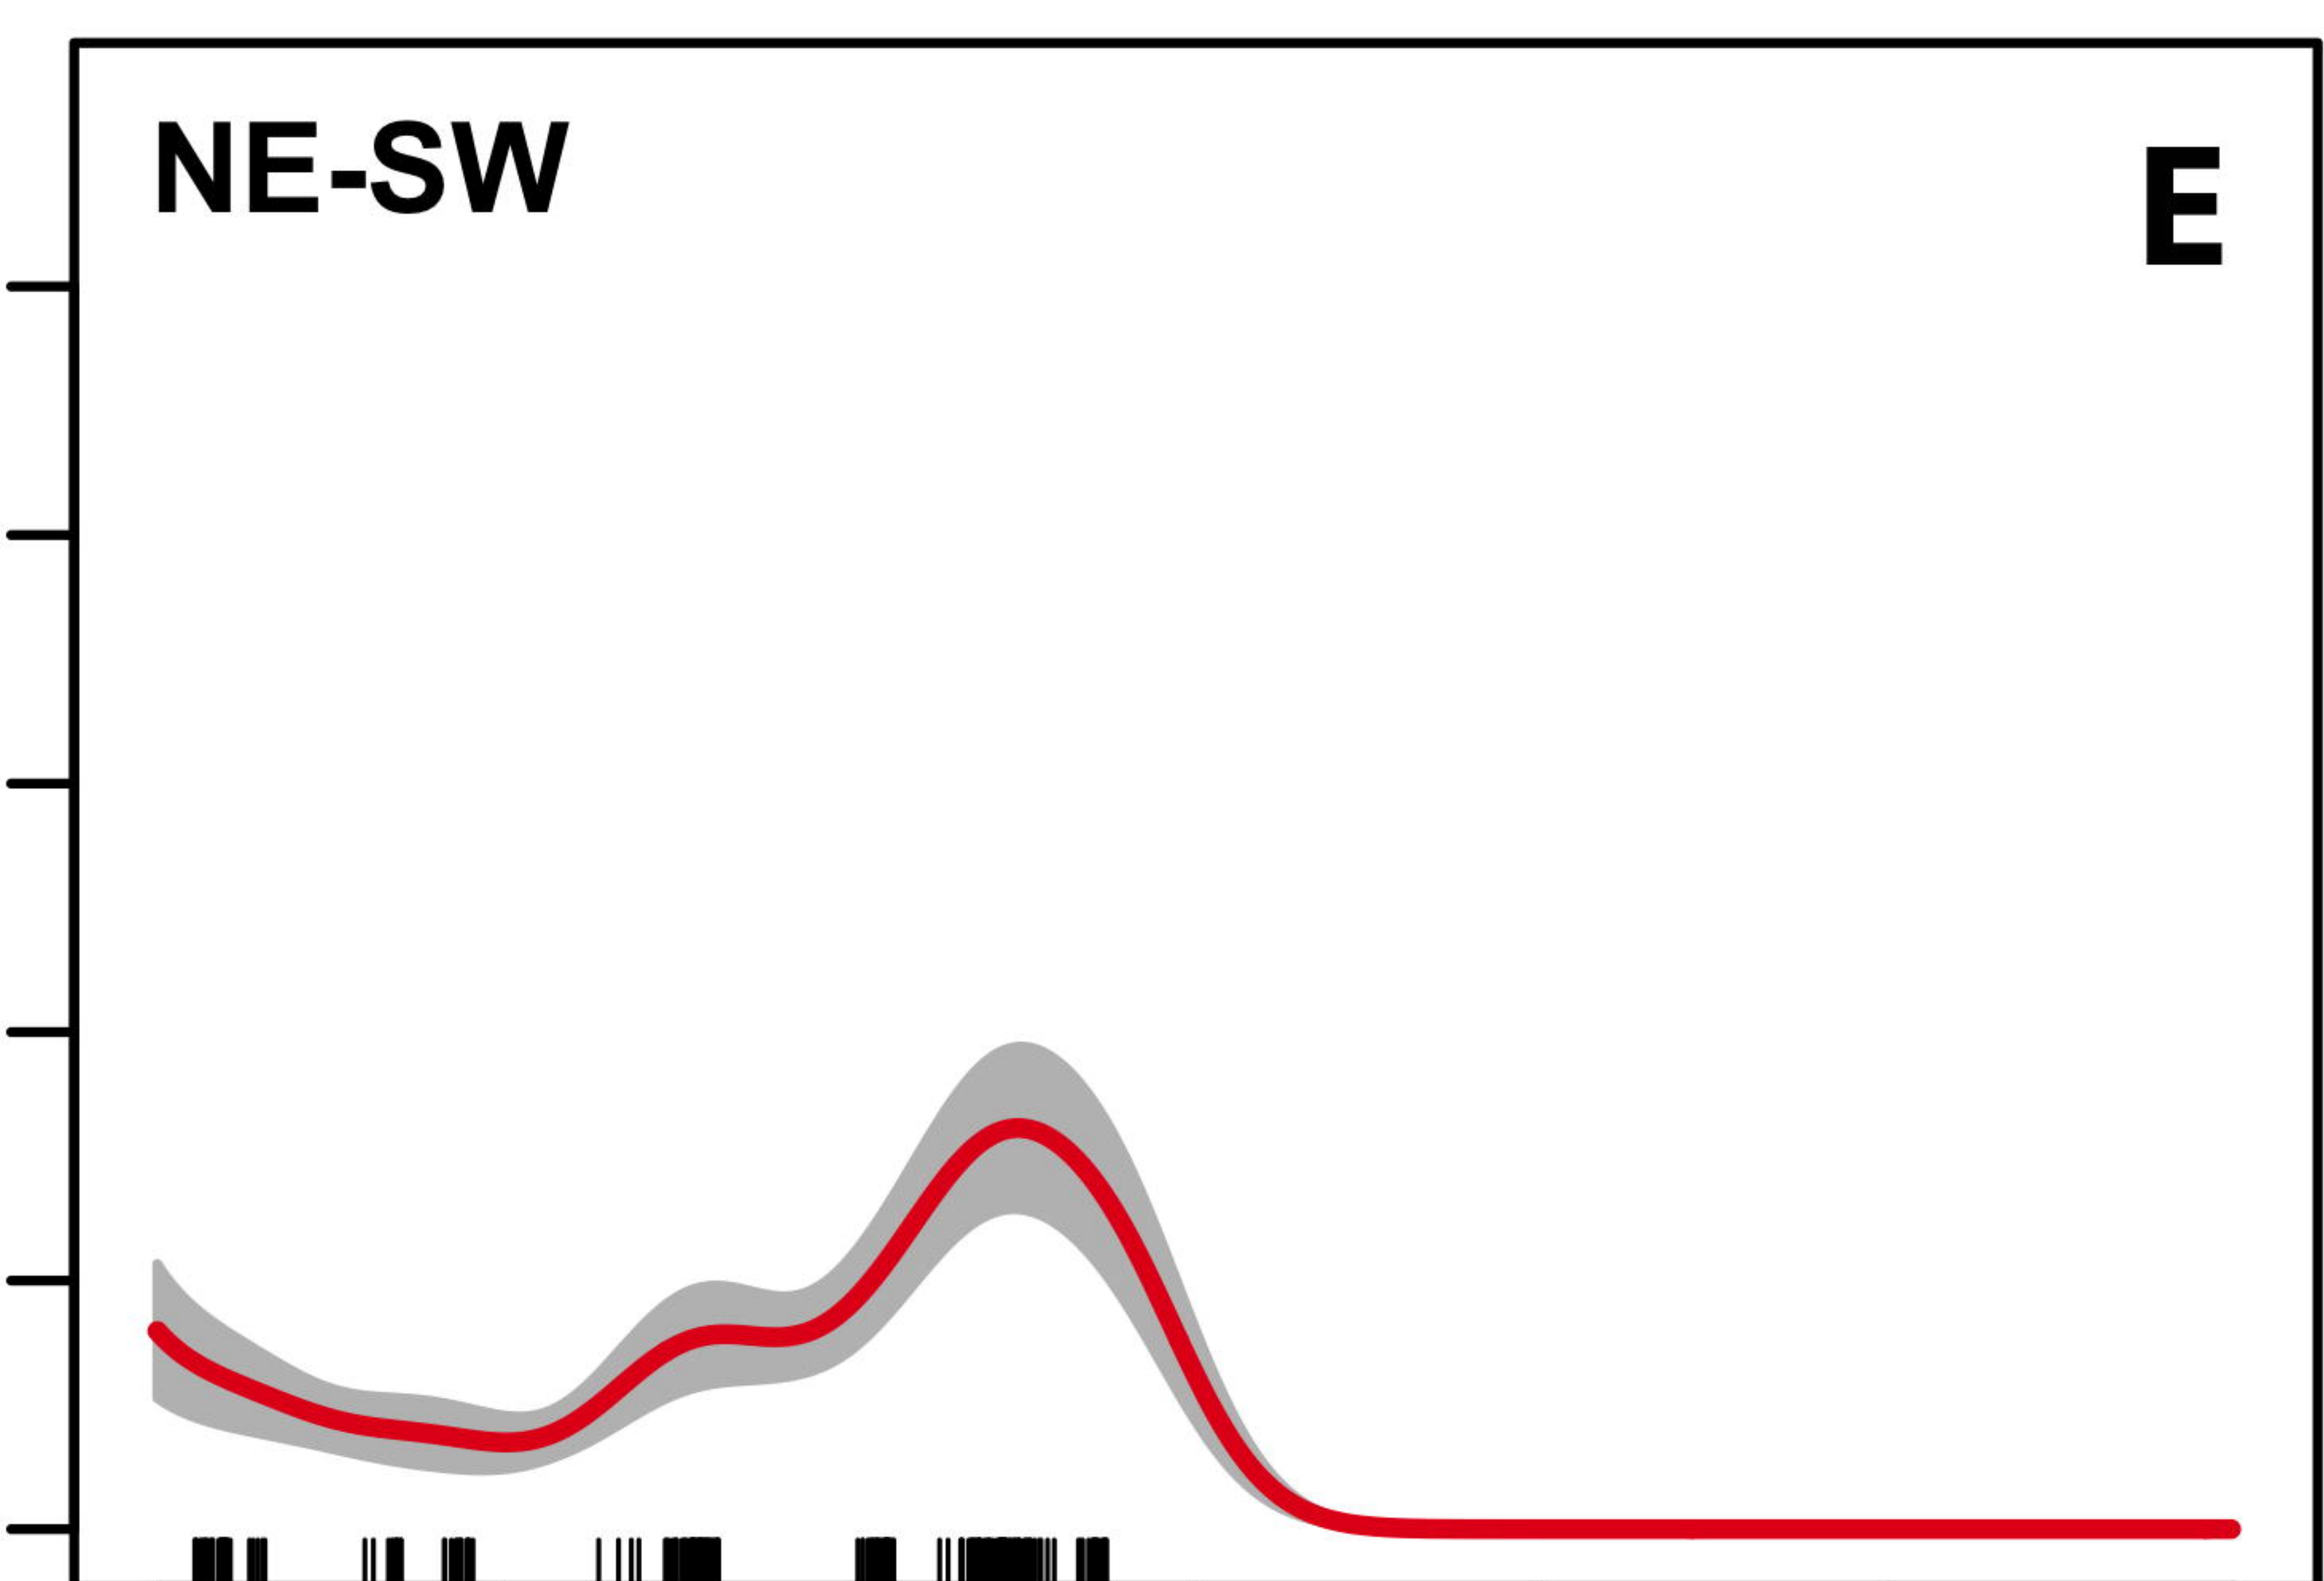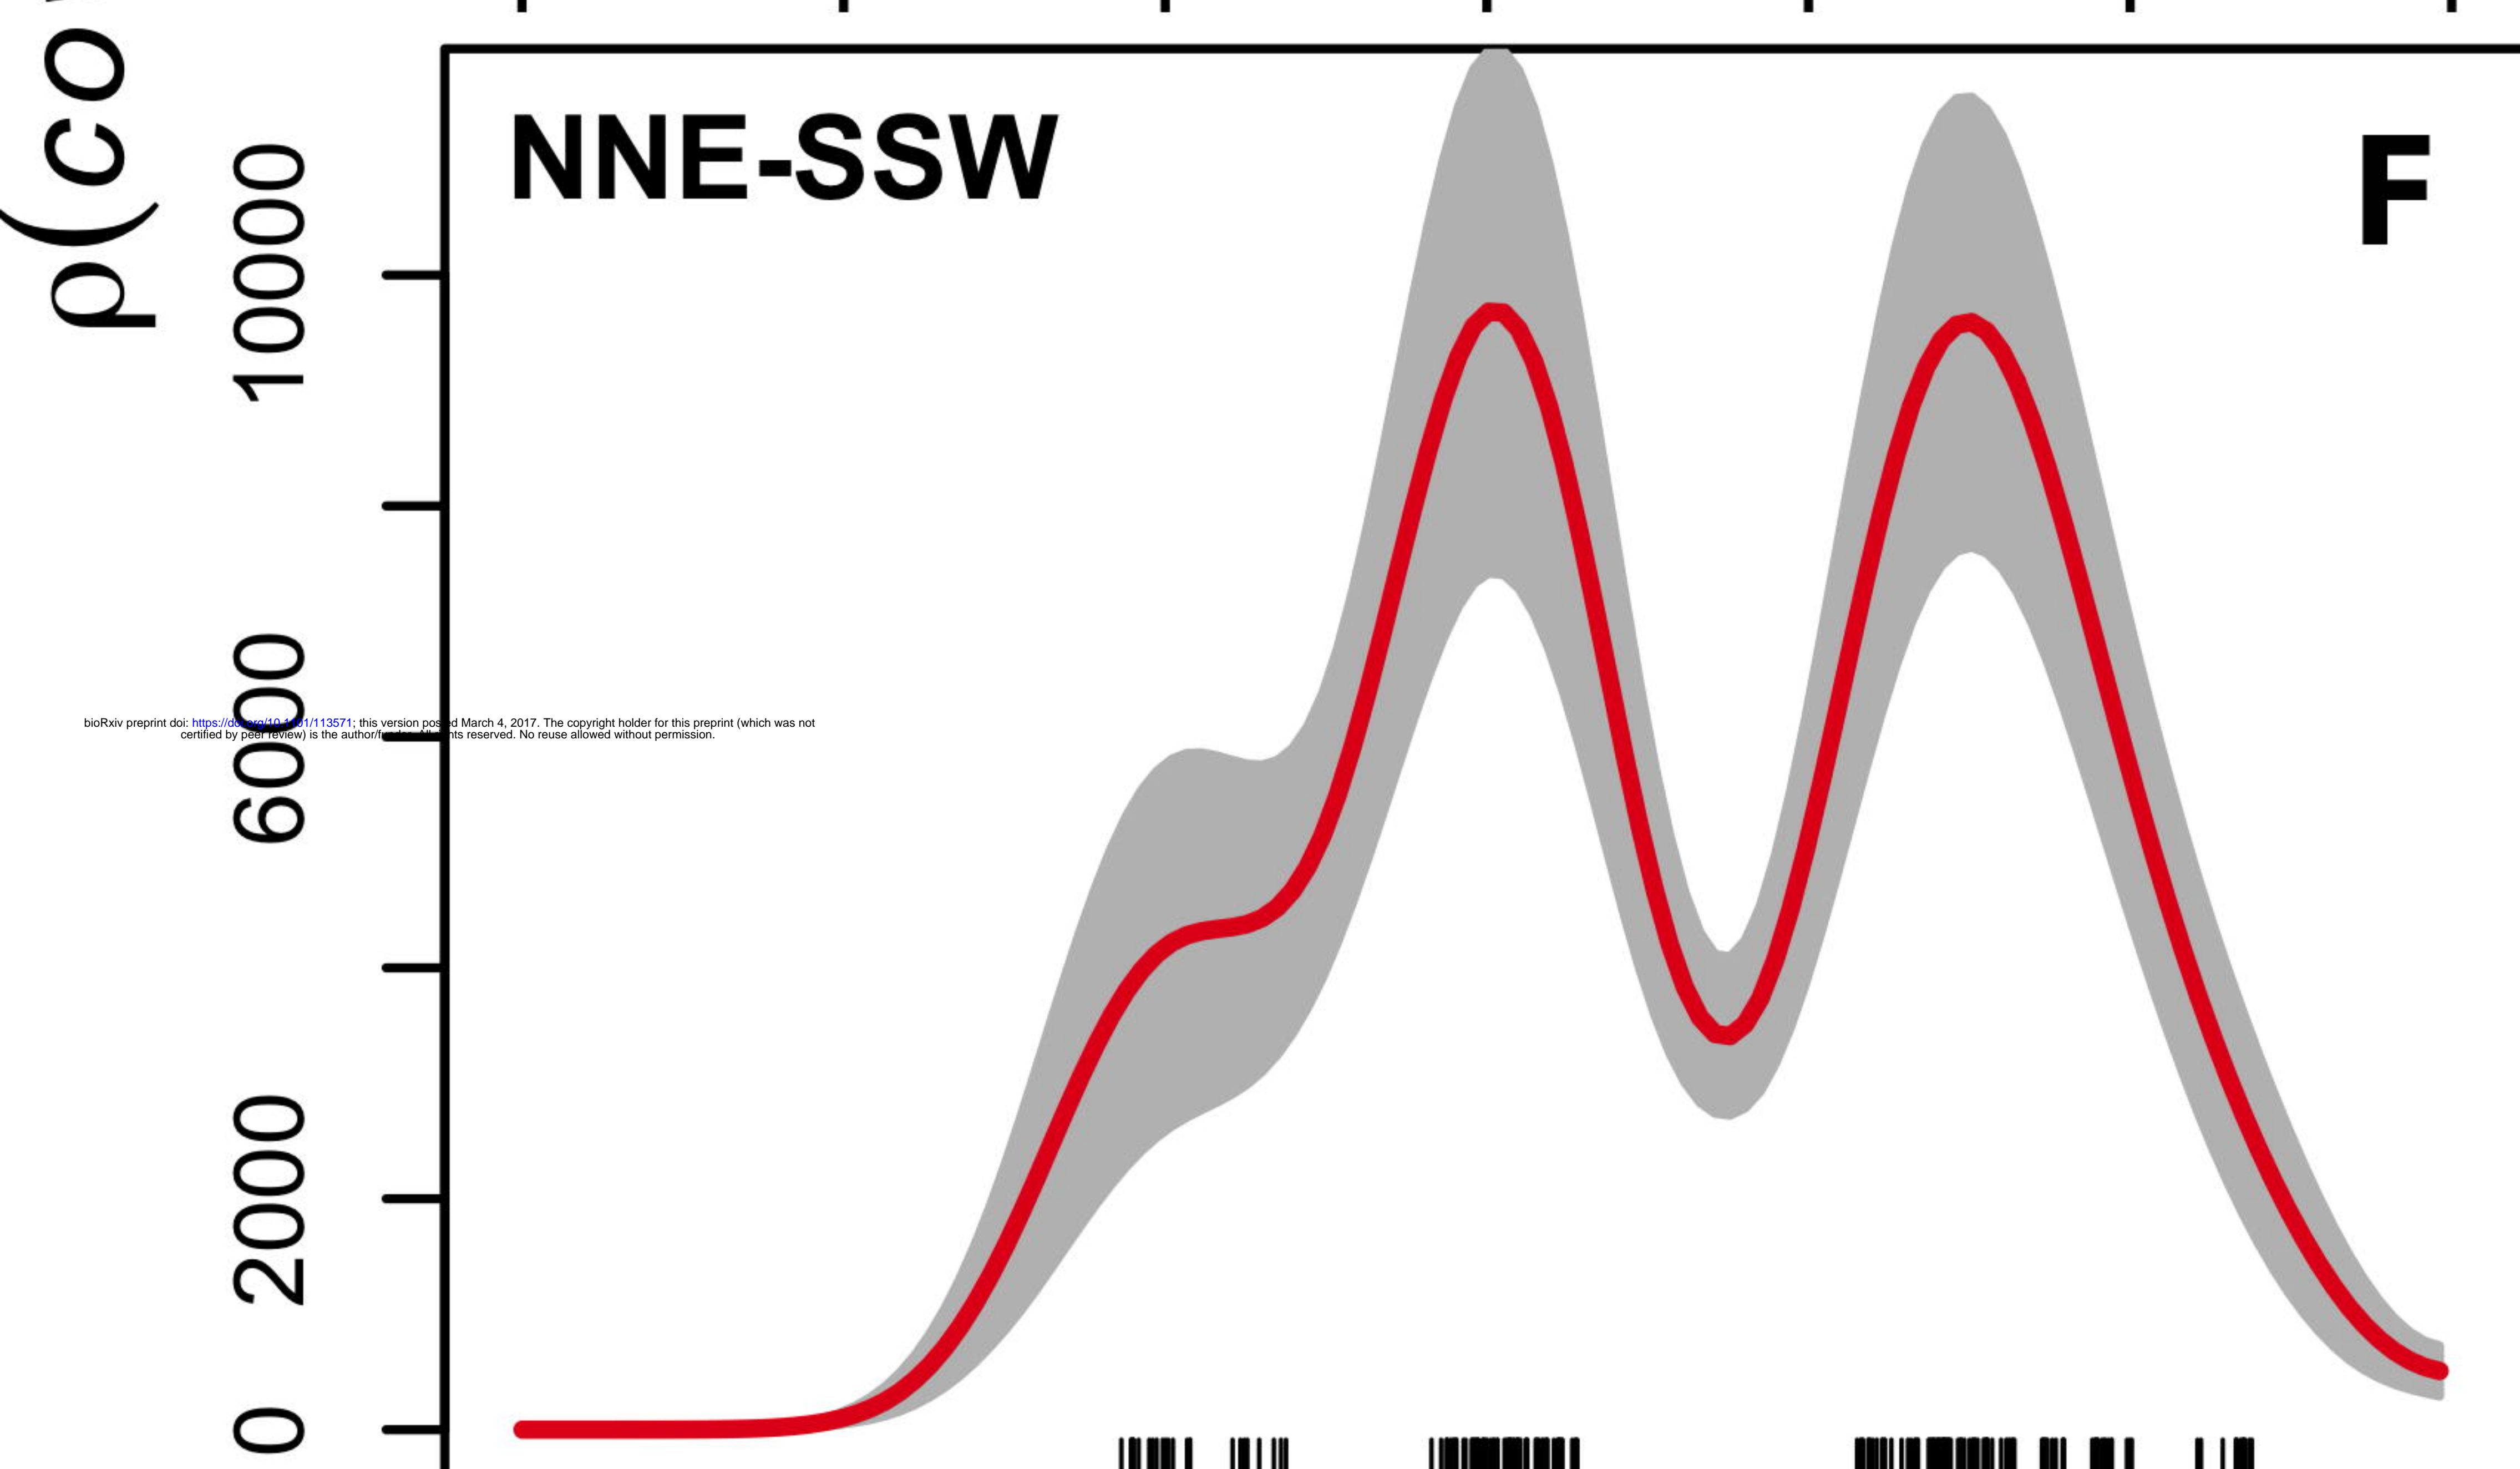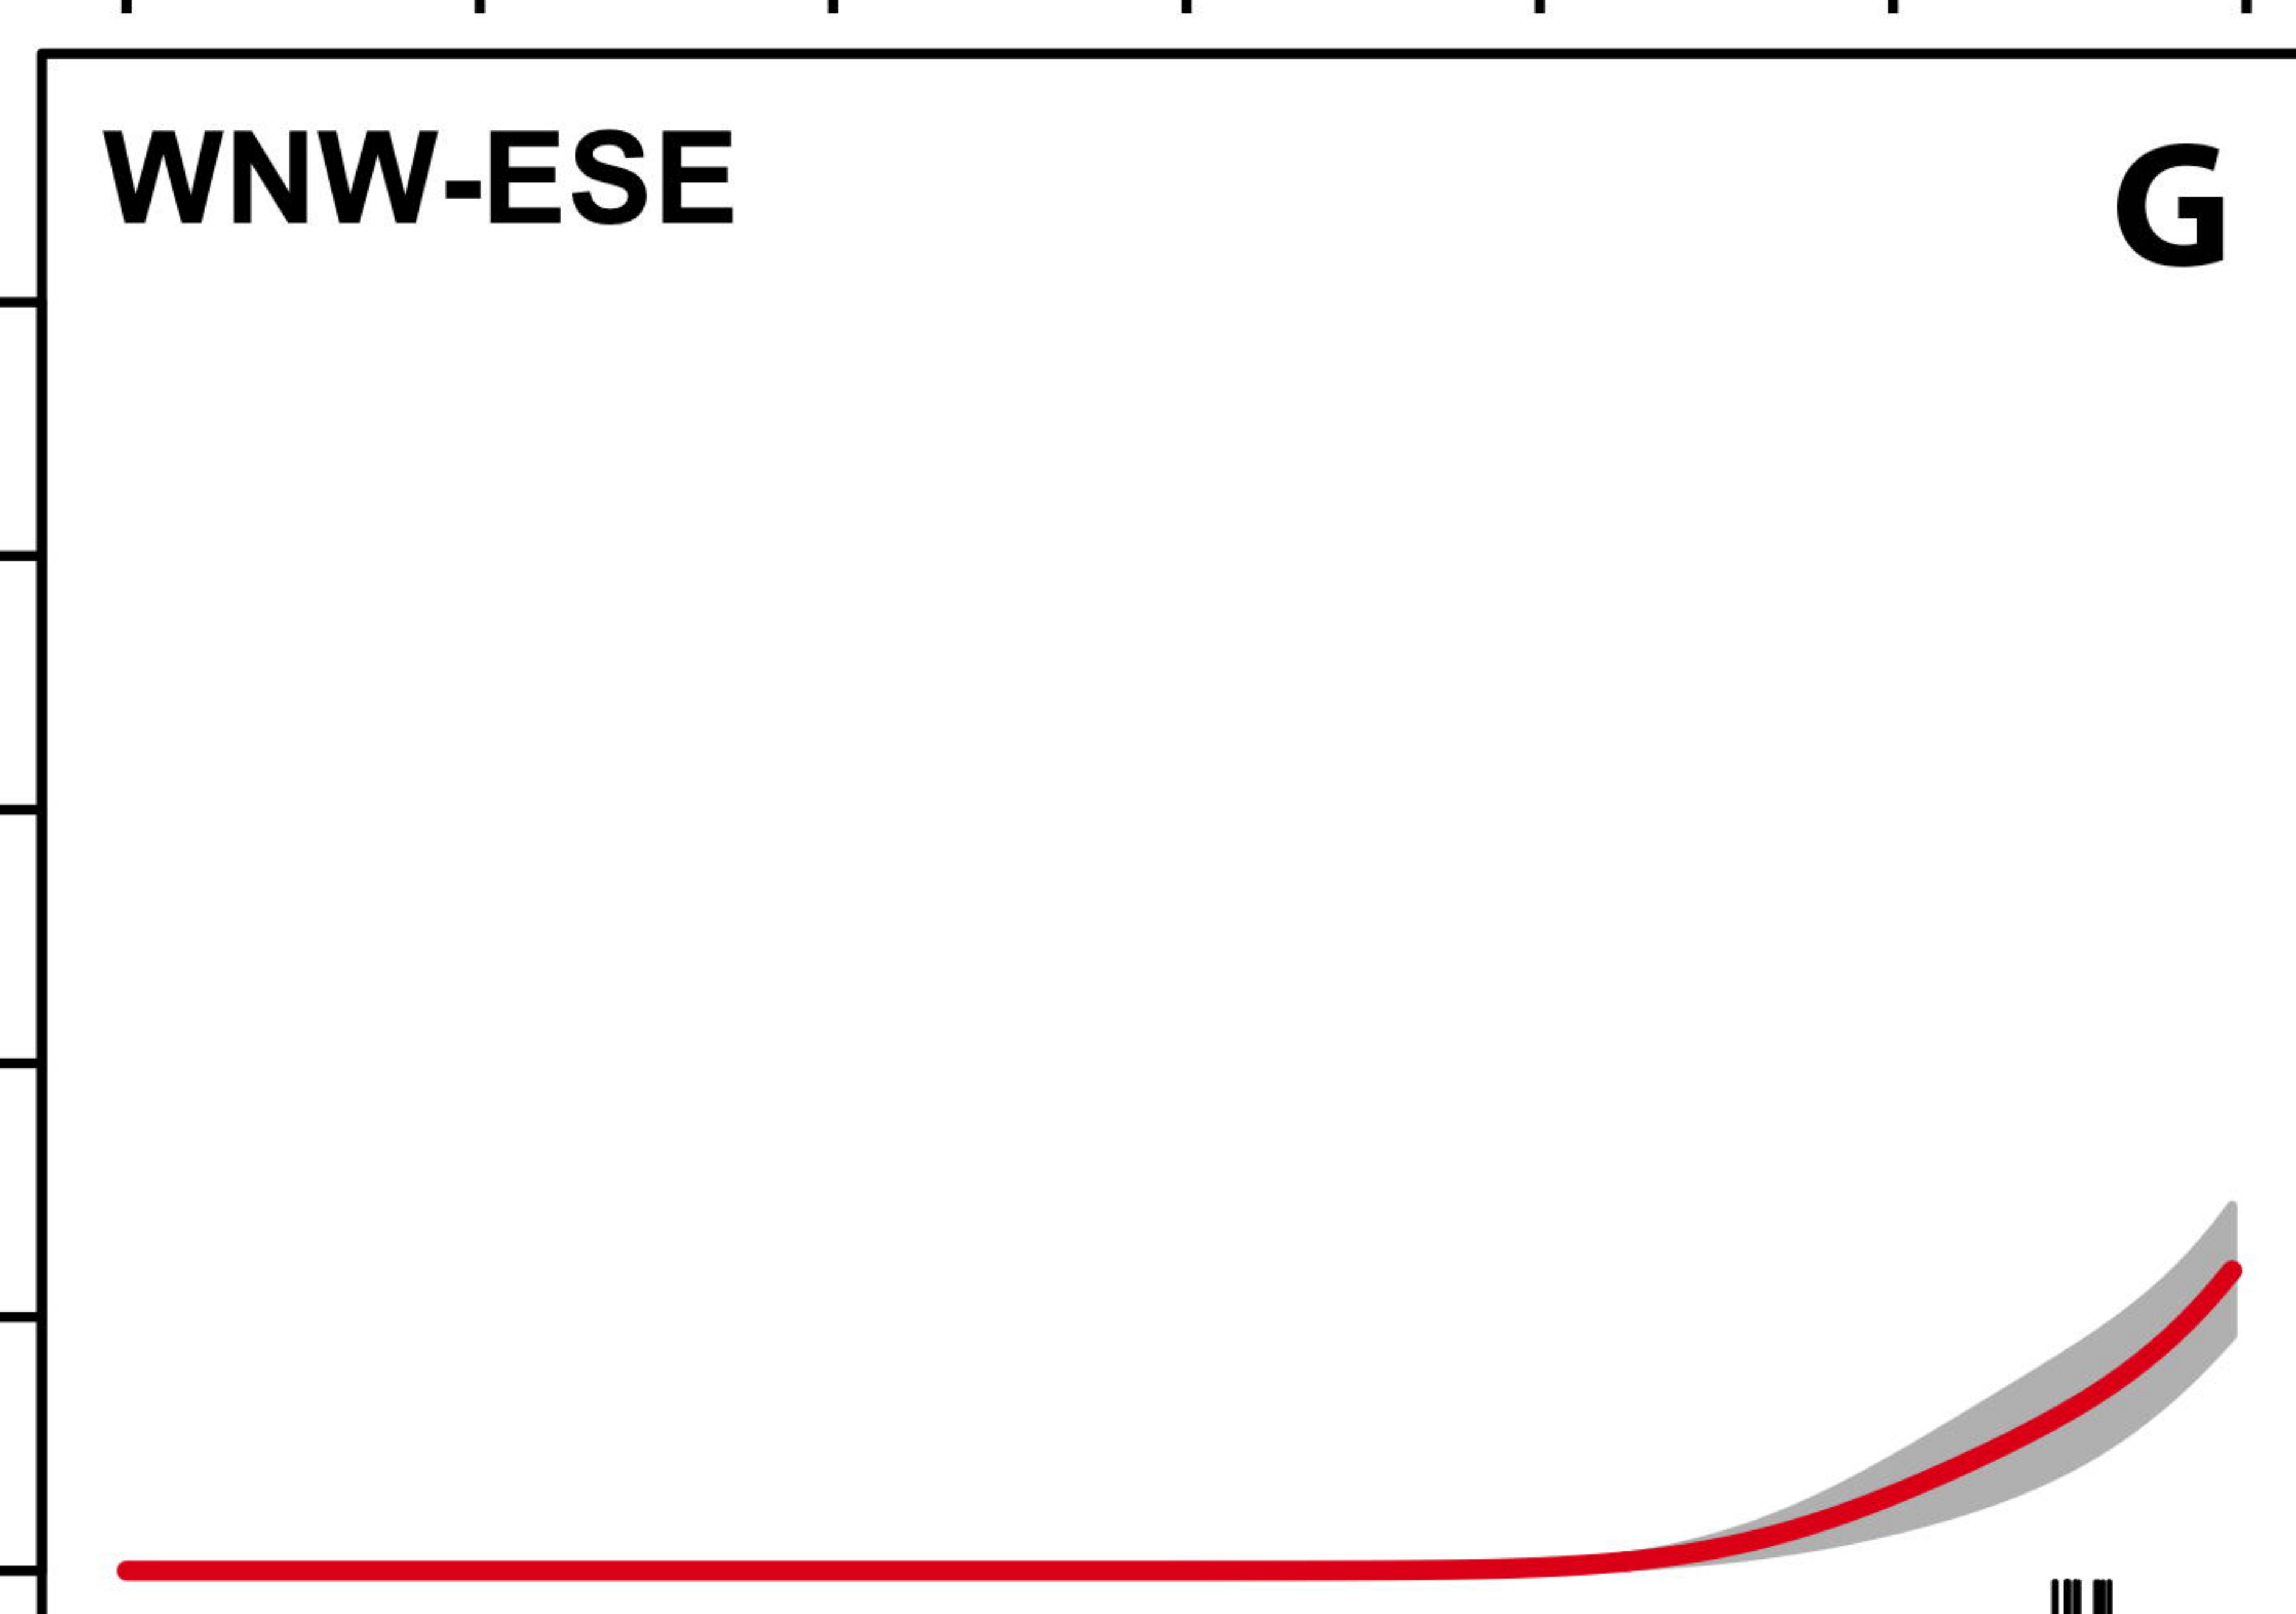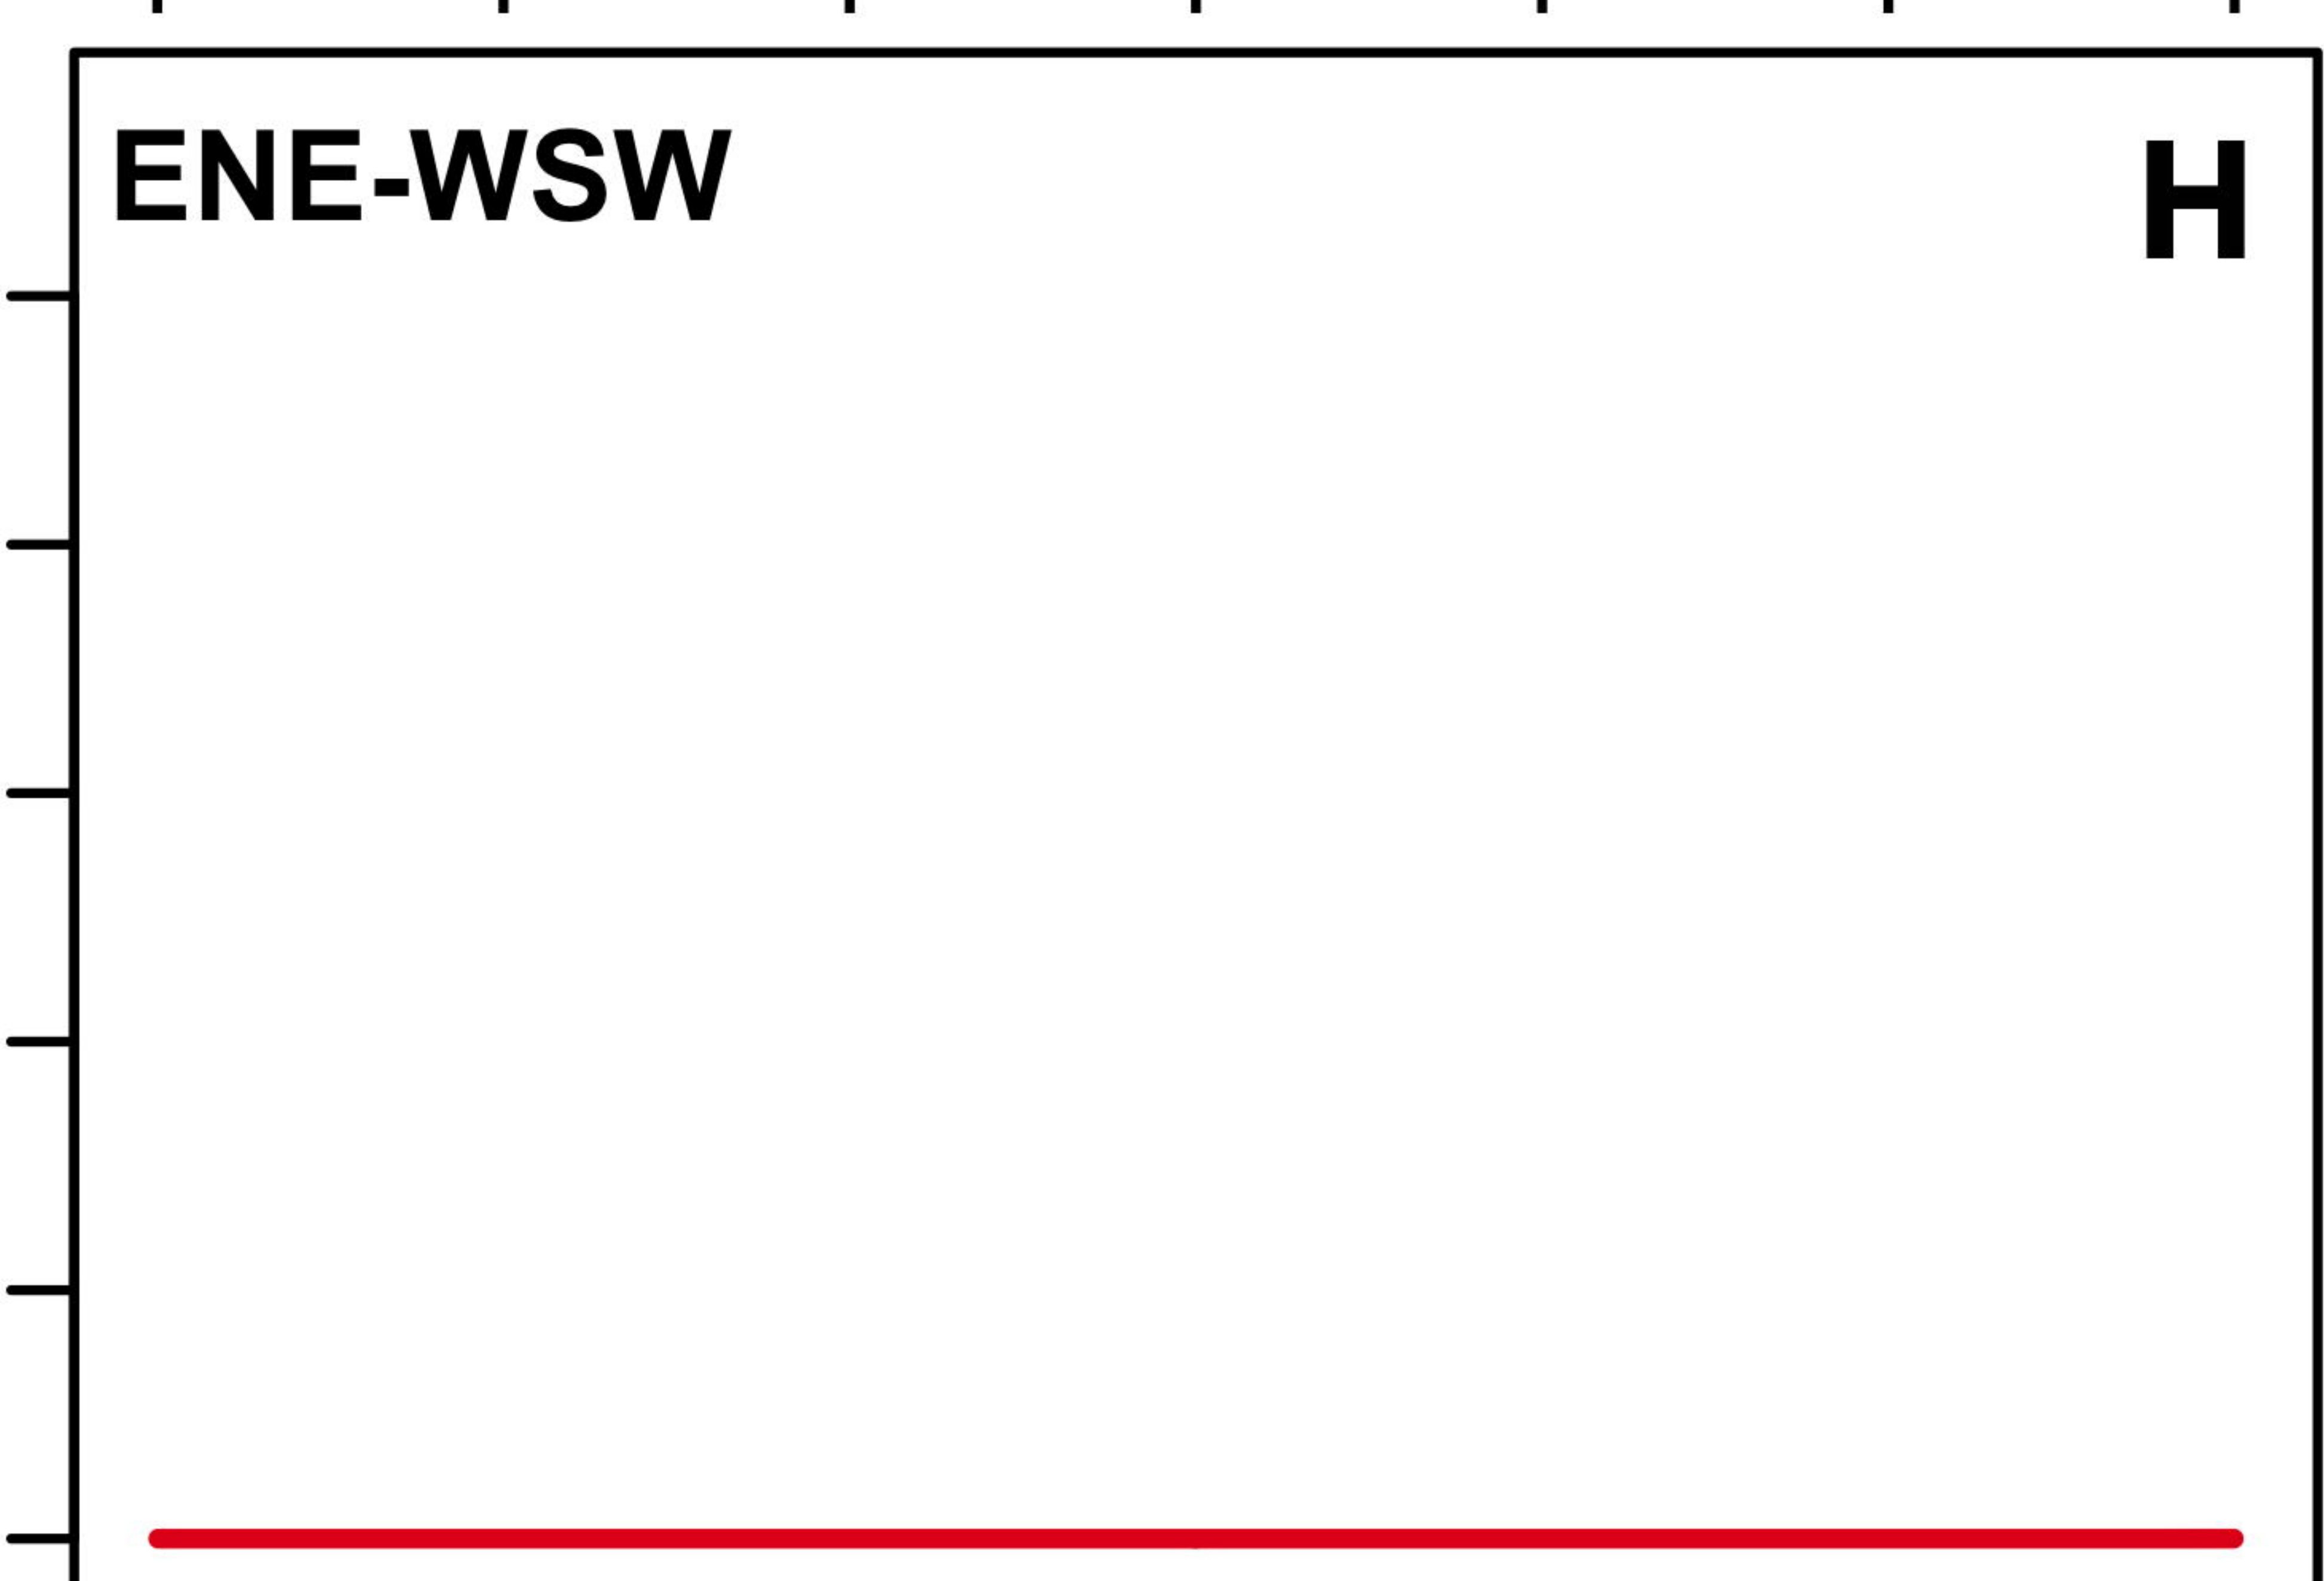

Distance to nearest fault
